# Supplementary material for: The genome sequence of African rice (Oryza glaberrima) and evidence for independent domestication
Source: Springer Nature journal article supplement (doi:10.1038/ng.3044), 2014-07-27
Supplement: 41588_2014_BFng3044_MOESM2_ESM.pdf [file 41588_2014_BFng3044_MOESM2_ESM.pdf]

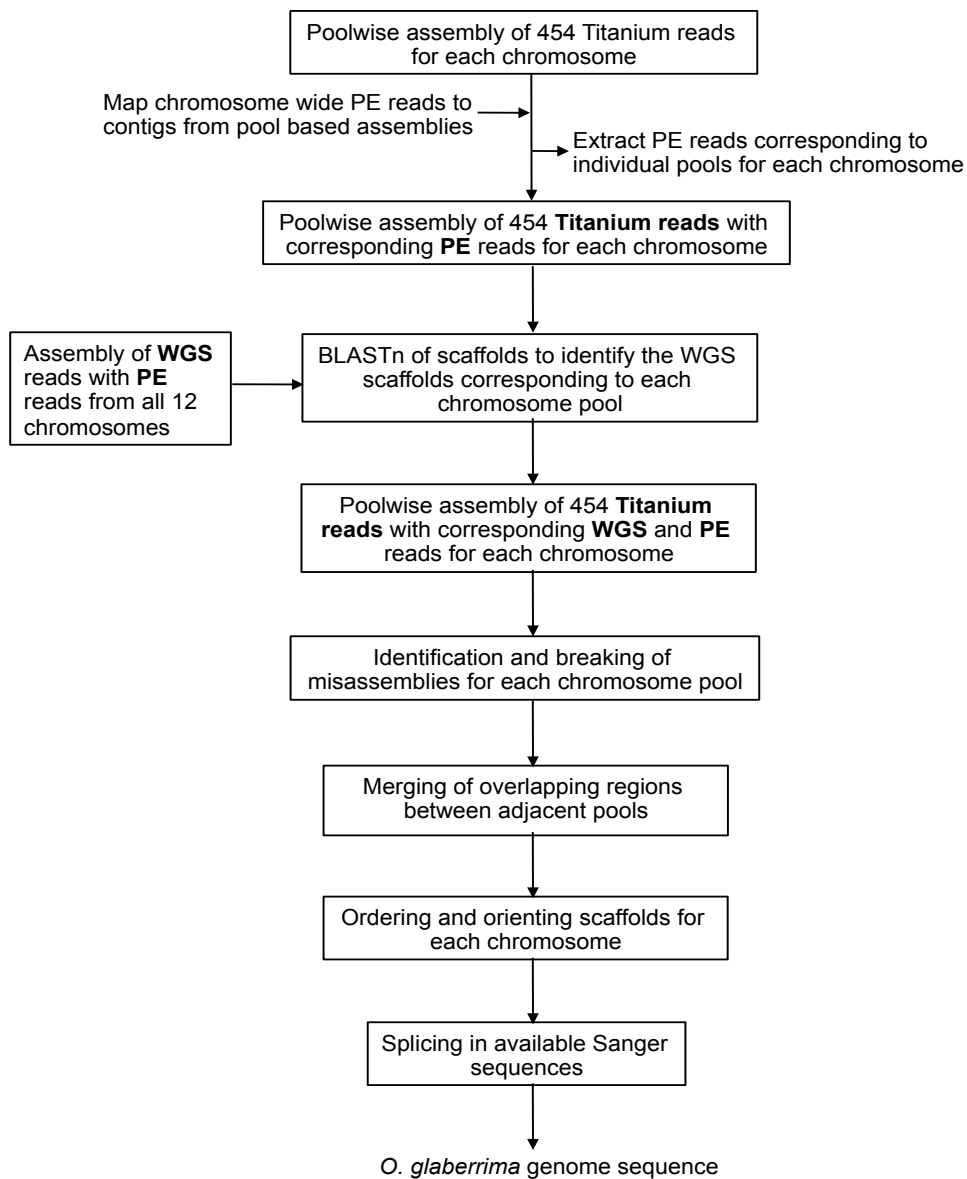

**Supplementary Figure 1** *O. glaberrima* genome assembly flowchart.

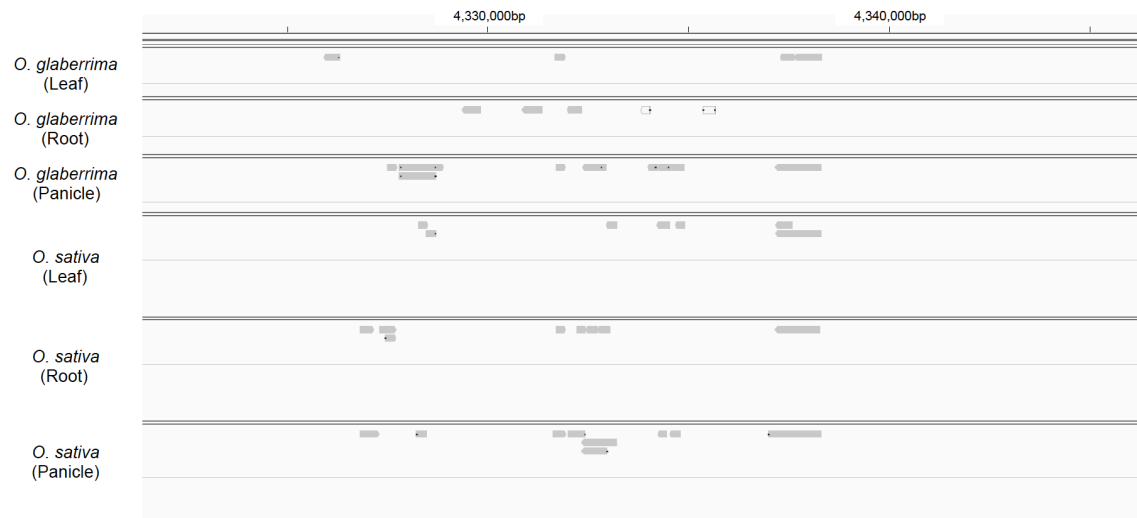

**Supplementary Figure 2A** Expression pattern of the *GI* gene in three tissues (leaf, root, mixed stage panicle) of *O. glaberrima* and *O. sativa*. *GI* was expressed in *O. glaberrima* and *O. sativa*. The raw RNA sequencing (RNA-Seq) reads from both species were assembled independently and then mapped to the *O. sativa* ssp. *japonica* reference sequence. Results of these alignments were visualized using integrated genomics viewer (IGV). Each gray bar represents one assembled RNA-Seq fragment.

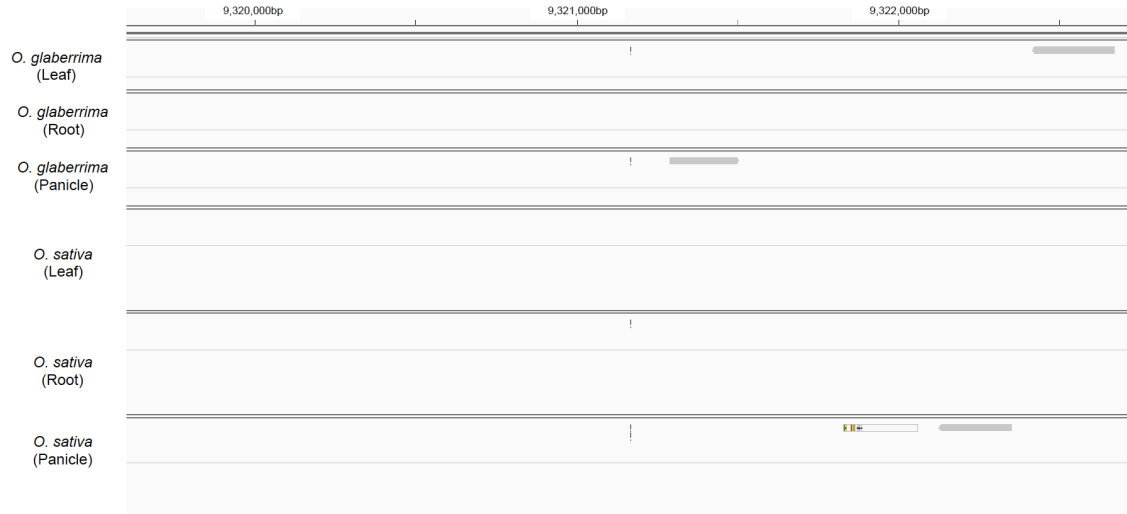

**Supplementary Figure 2B** Expression pattern of *ARP6* gene in three tissues (leaf, root, mixed stage panicle) in *O. glaberrima* and *O. sativa*. *ARP6* was expressed in *O. glaberrima* and *O. sativa*. The raw RNA sequencing (RNA-Seq) reads from both species were assembled independently and then mapped to the *O. sativa* ssp. *japonica* reference sequence. Results of these alignments were visualized using integrated genomics viewer (IGV). Each gray bar represents one assembled RNA-Seq fragment.

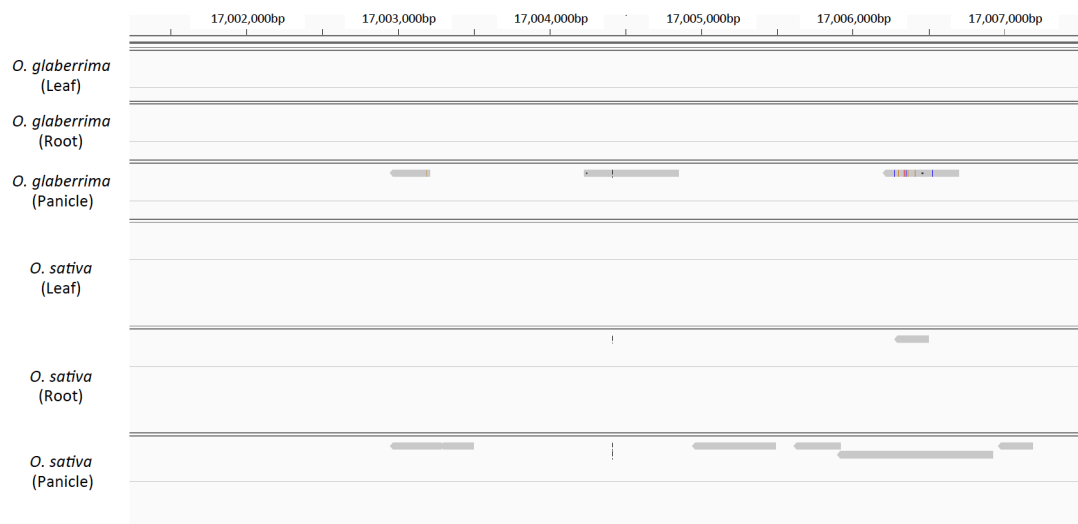

**Supplementary Figure 2C** Expression pattern of *RFT1* gene in three tissues (leaf, root, mixed stage panicle) in *O. glaberrima* and *O. sativa*. *RFT1* was expressed in *O. glaberrima* and *O. sativa*. The raw RNA sequencing (RNA-Seq) reads from both species were assembled independently and then mapped to the *O. sativa* ssp. *japonica* reference sequence. Results of these alignments were visualized using integrated genomics viewer (IGV). Each gray bar represents one assembled RNA-Seq fragment.

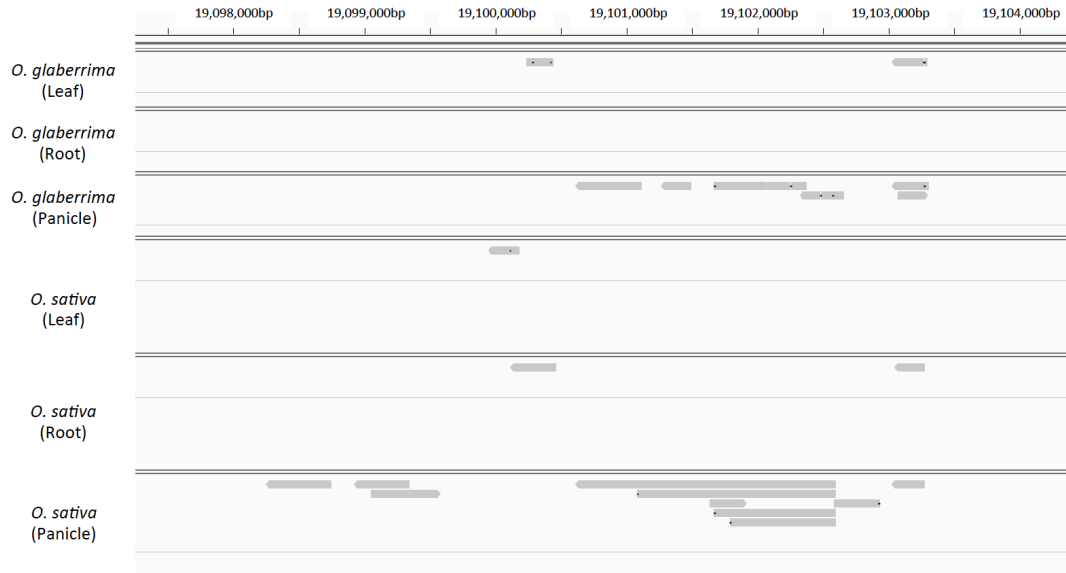

**Supplementary Figure 2D** Expression pattern of *SPL3* gene in three tissues (leaf, root, mixed stage panicle) in *O. glaberrima* and *O. sativa*. *SPL3* was expressed in *O. glaberrima* and *O. sativa*. The raw RNA sequencing (RNA-Seq) reads from both species were assembled independently and then mapped to the *O. sativa* ssp. *japonica* reference sequence. Results of these alignments were visualized using integrated genomics viewer (IGV). Each gray bar represents one assembled RNA-Seq fragment.

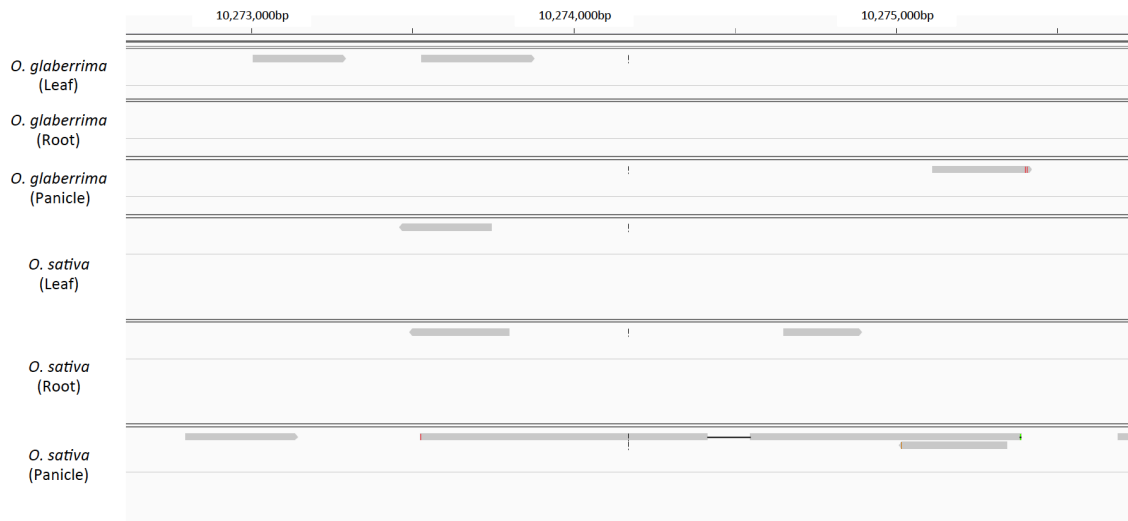

**Supplementary Figure 2E** Expression pattern of *PIF3* gene in three tissues (leaf, root, mixed stage panicle) in *O. glaberrima* and *O. sativa*. *PIF3* was expressed in *O. glaberrima* and *O. sativa*. The raw RNA sequencing (RNA-Seq) reads from both species were assembled independently and then mapped to the *O. sativa* ssp. *japonica* reference sequence. Results of these alignments were visualized using integrated genomics viewer (IGV). Each gray bar represents one assembled RNA-Seq fragment.

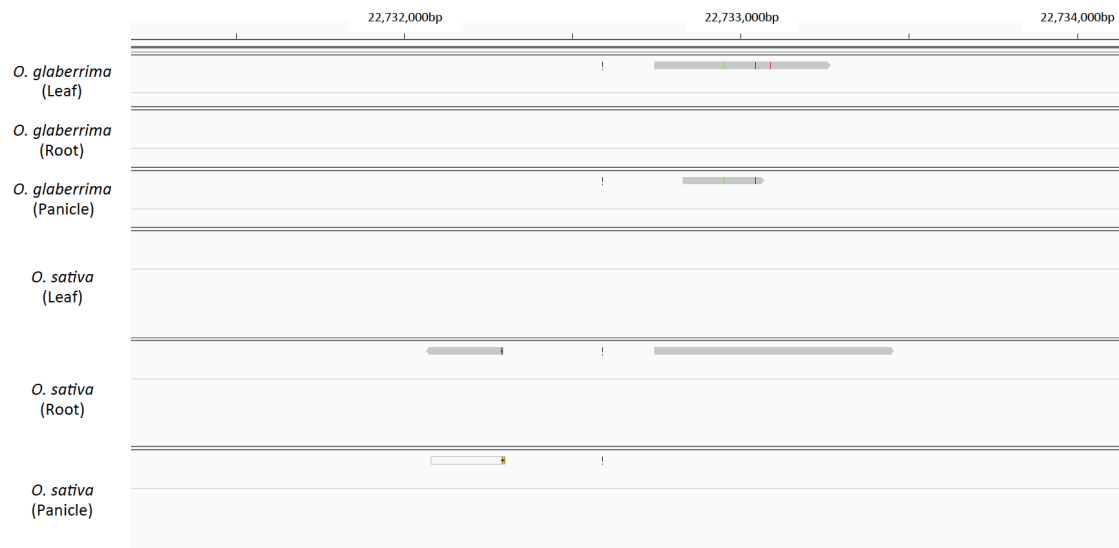

**Supplementary Figure 2F** Expression pattern of *WRKY77* gene in three tissues (leaf, root, mixed stage panicle) in *O. glaberrima* and *O. sativa*. *WRKY77* was expressed in *O. glaberrima* and *O. sativa*. The raw RNA sequencing (RNA-Seq) reads from both species were assembled independently and then mapped to the *O. sativa* ssp. *japonica* reference sequence. Results of these alignments were visualized using integrated genomics viewer (IGV). Each gray bar represents one assembled RNA-Seq fragment.

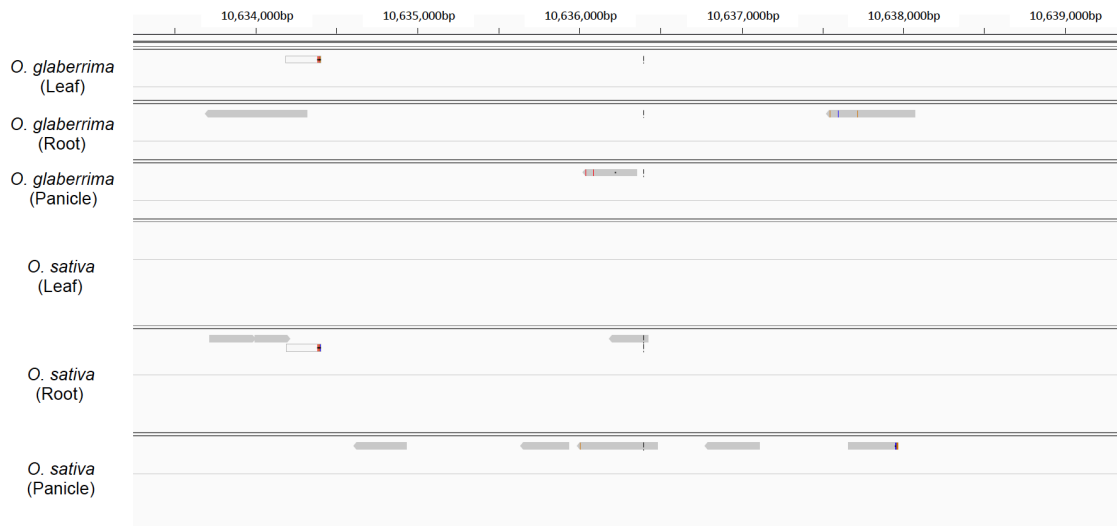

**Supplementary Figure 2G** Expression pattern of *WRKY* gene in three tissues (leaf, root, mixed stage panicle) in *O. glaberrima* and *O. sativa*. *WRKY* was expressed in *O. glaberrima* and *O. sativa*. The raw RNA sequencing (RNA-Seq) reads from both species were assembled independently and then mapped to the *O. sativa* ssp. *japonica* reference sequence. Results of these alignments were visualized using integrated genomics viewer (IGV). Each gray bar represents one assembled RNA-Seq fragment.



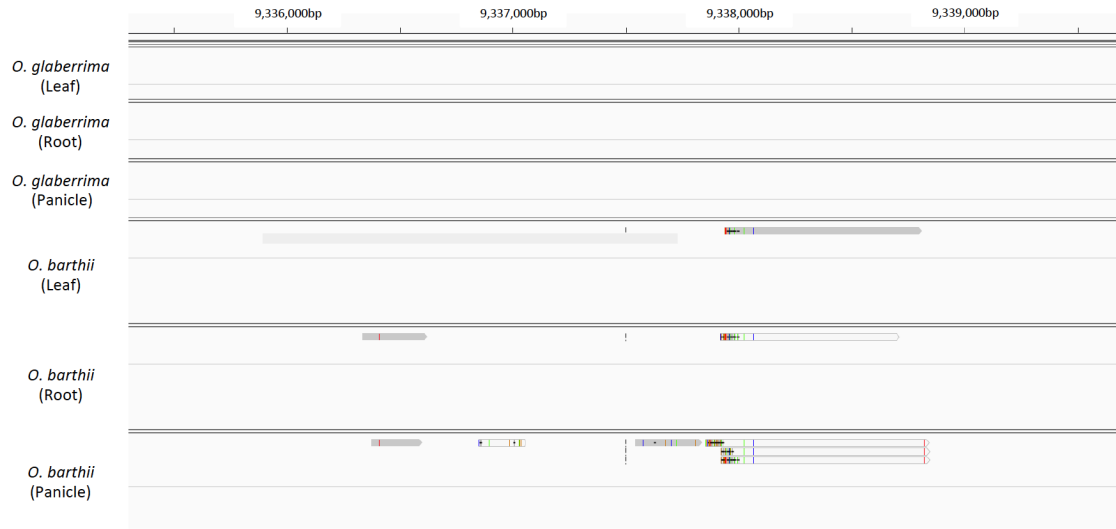

**Supplementary Figure 3** Expression pattern of *Hd1* gene in three tissues (leaf, root, mixed stage panicle) in *O. glaberrima* and *O. barthii*. *Hd1* was expressed in *O. barthii* but not in *O. glaberrima*. The raw RNA sequencing (RNA-Seq) reads from both species were assembled independently and then mapped to the *O. sativa* ssp. *japonica* reference sequence. Results of these alignments were visualized using integrated genomics viewer (IGV). Each gray bar represents one assembled RNA-Seq fragment.

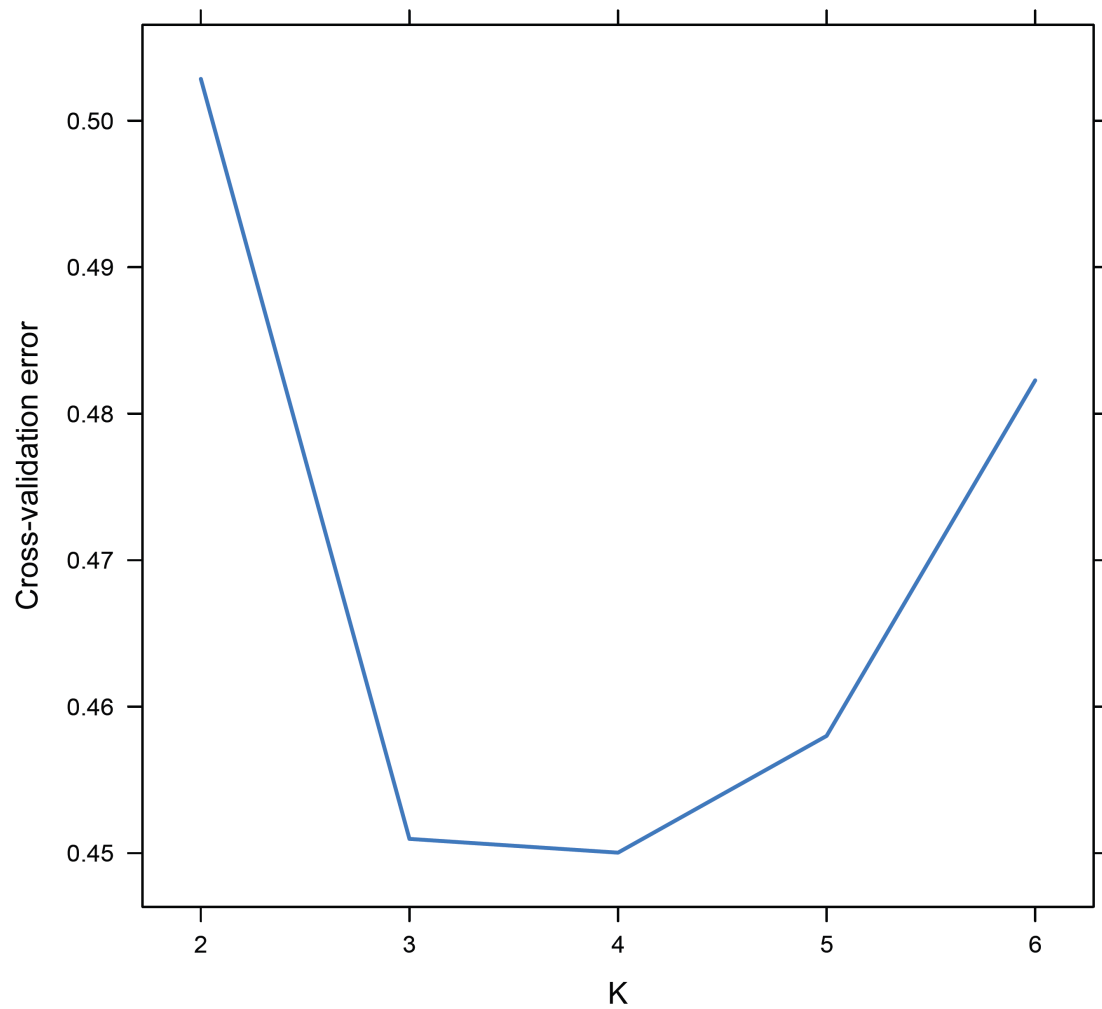

**Supplementary Figure 4** Cross-validation error of each K value when estimating the population structure of 94 *O. barthii* accessions. Cross-validation error is smallest when K equals to 4. The 4 subgroups of *O. barthii* population were identified according to the result when K equals to 4.

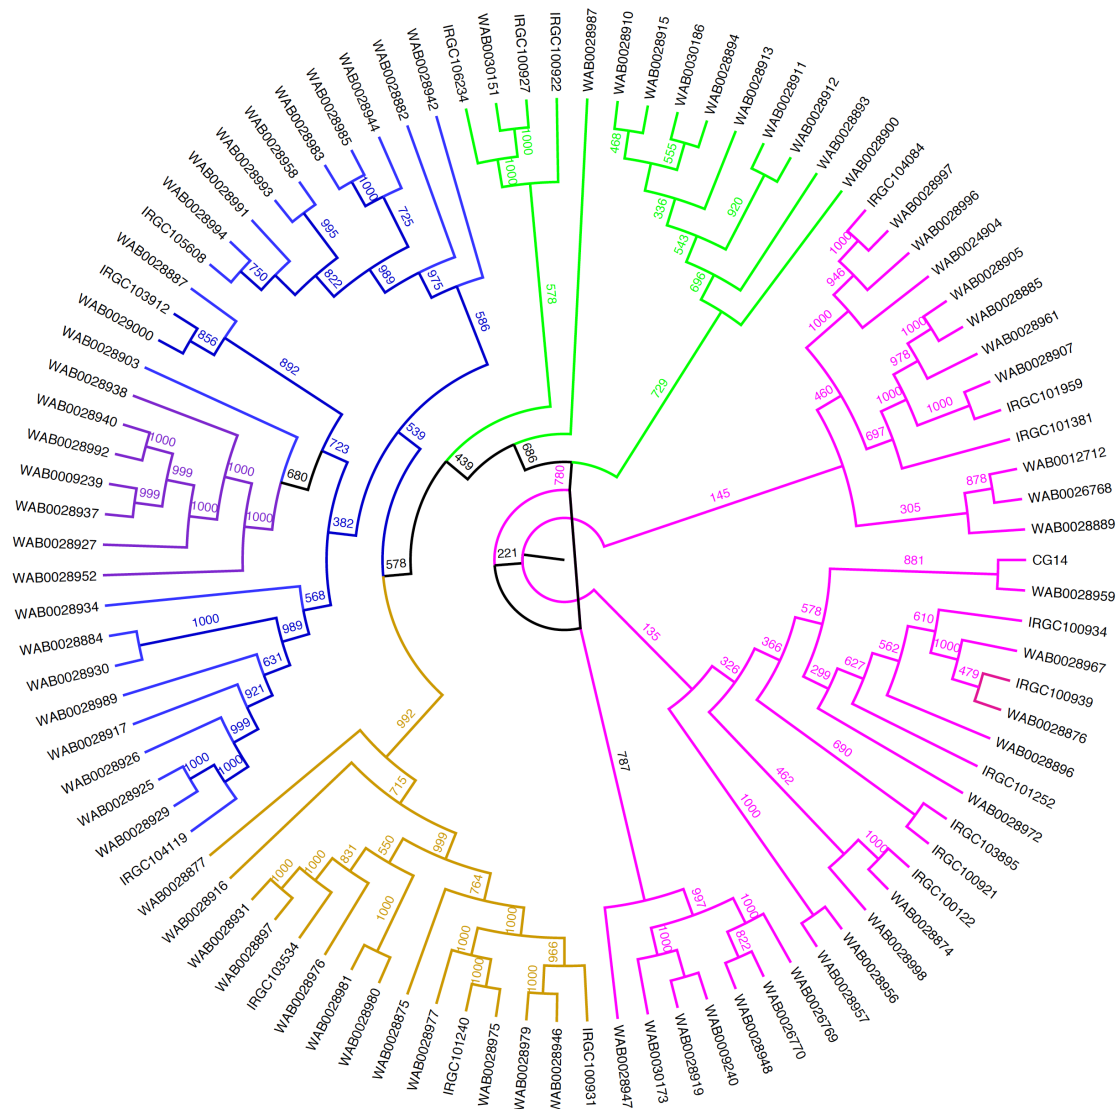

**Supplementary Figure 5** Neighbor-joining phylogenetic tree of 94 *O. barthii* accessions. The bootstrap value is labeled on each branch (from 1000 replicates). The *O. barthii* population is partitioned into four subgroups: OB-I (Orange), OB-II (Blue), OB-III (Purple), OB-V (Pink), as well as an admixed group: OB-IV (Green).

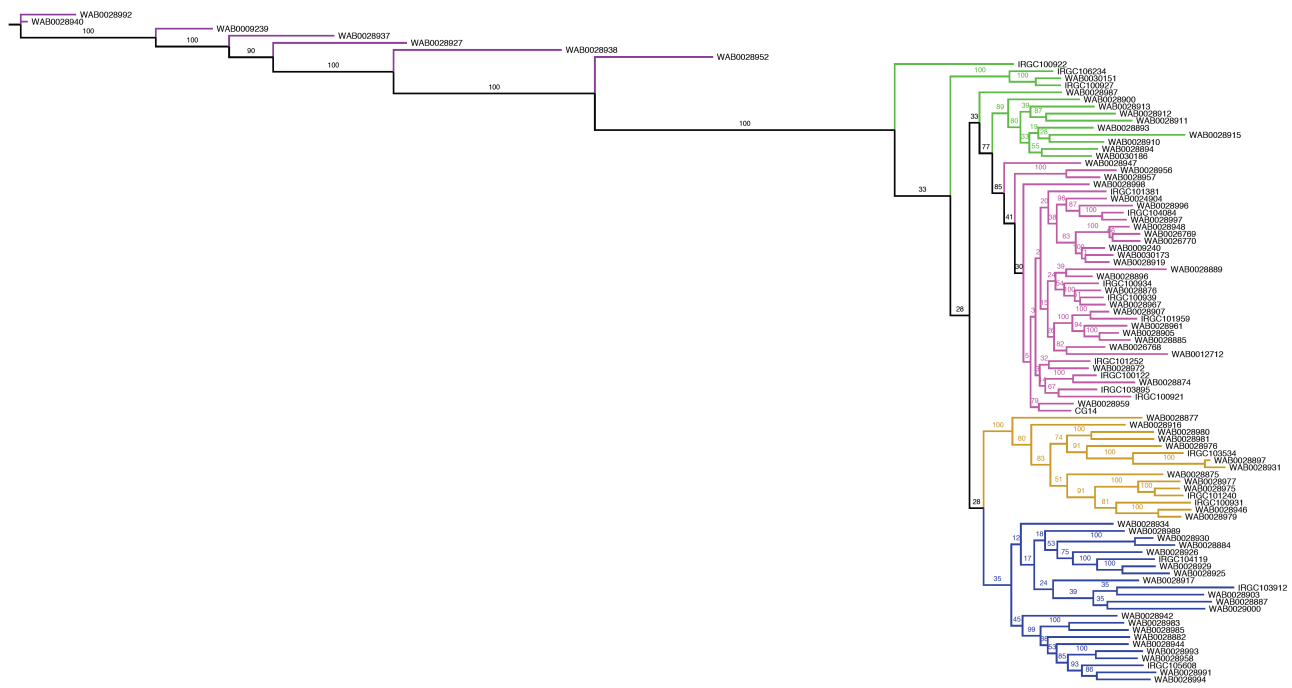

**Supplementary Figure 6** Maximum likelihood (ML) tree of 94 *O. barthii* accessions. The bootstrap value is labeled on each branch (from 100 replicates). The *O. barthii* population is partitioned into four subgroups: OB-I (Orange), OB-II (Blue), OB-III (Purple), OB-V (Pink), as well as an admixed group: OB-IV (Green). OB-III is genetically distinct from the rest of the groups.

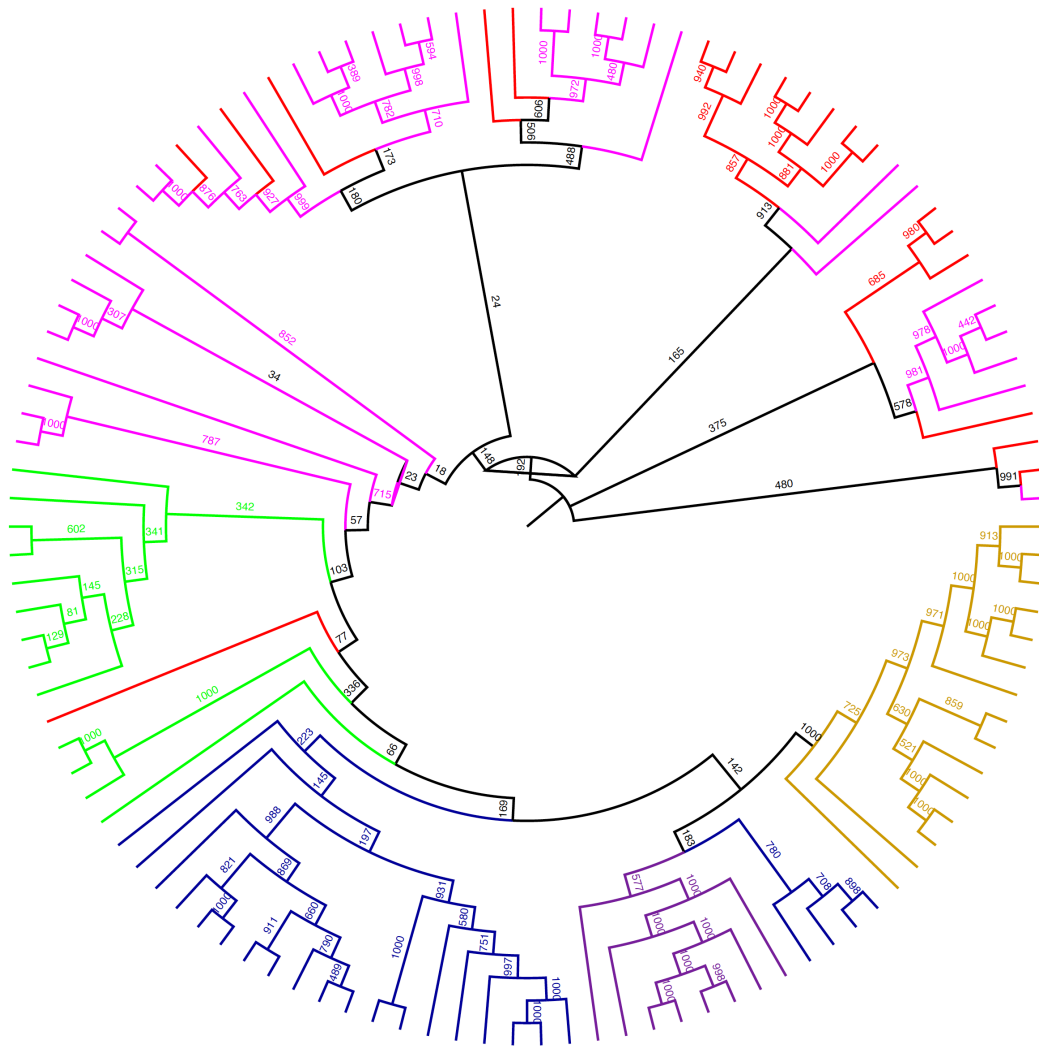

**Supplementary Figure 7** Neighbor-joining phylogenetic tree of 20 *O. glaberrima* and 94 *O. barthii* accessions. Bootstrap value (from 1000 replicates) is labeled on each branch. Five *O. barthii* subgroups are labeled as orange (OB-I), blue (OB-II), purple (OB-III), green (OB-IV), and pink (OB-V). *O. glaberrima* accessions are labelled in red.

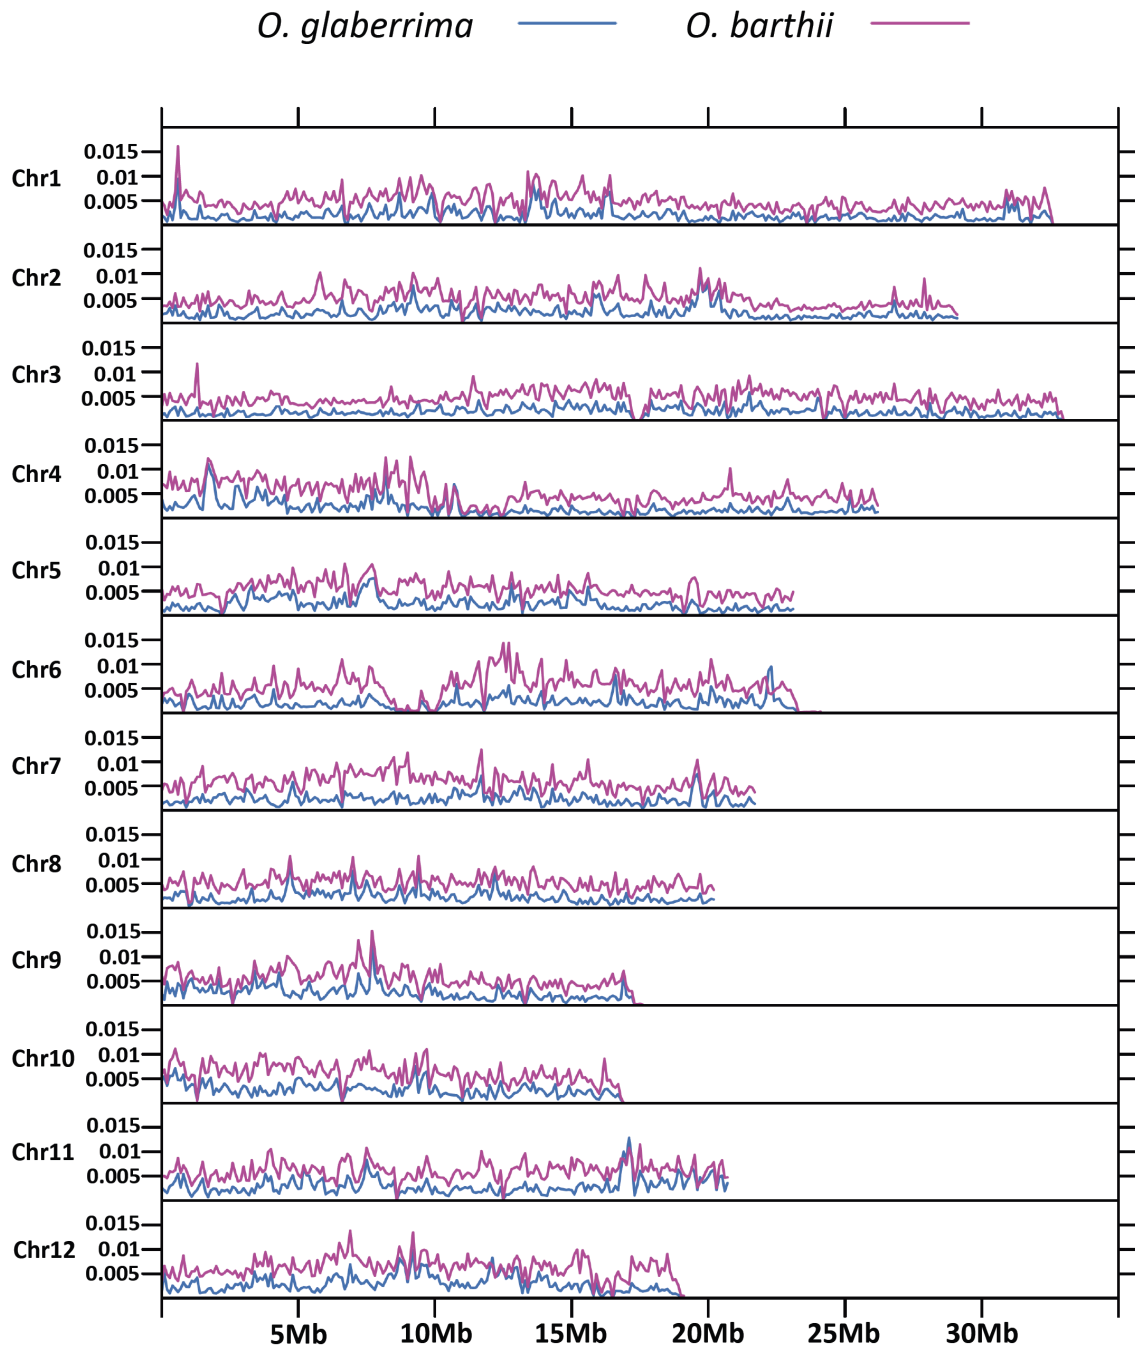

**Supplementary Figure 8** Genome-wide distribution of genetic diversity ( $\pi$ ) along the 12 chromosomes of *O. glaberrima* and *O. barthii*.

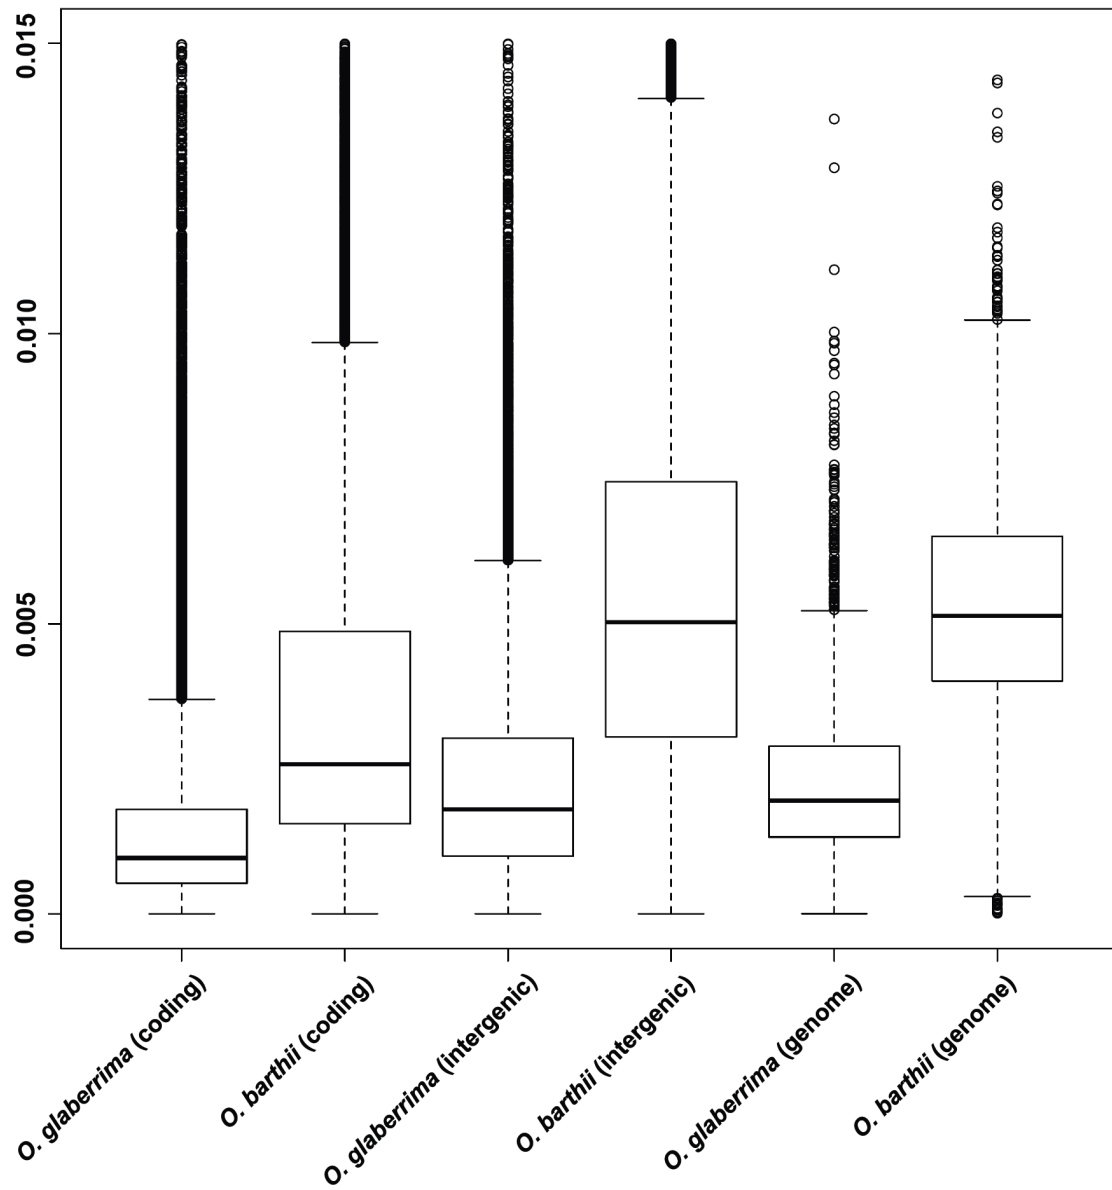

**Supplementary Figure 9** Boxplot of coding, intergenic and genome-wide nucleotide diversity ( $\pi$ ) between *O. glaberrima* and *O. barthii*.

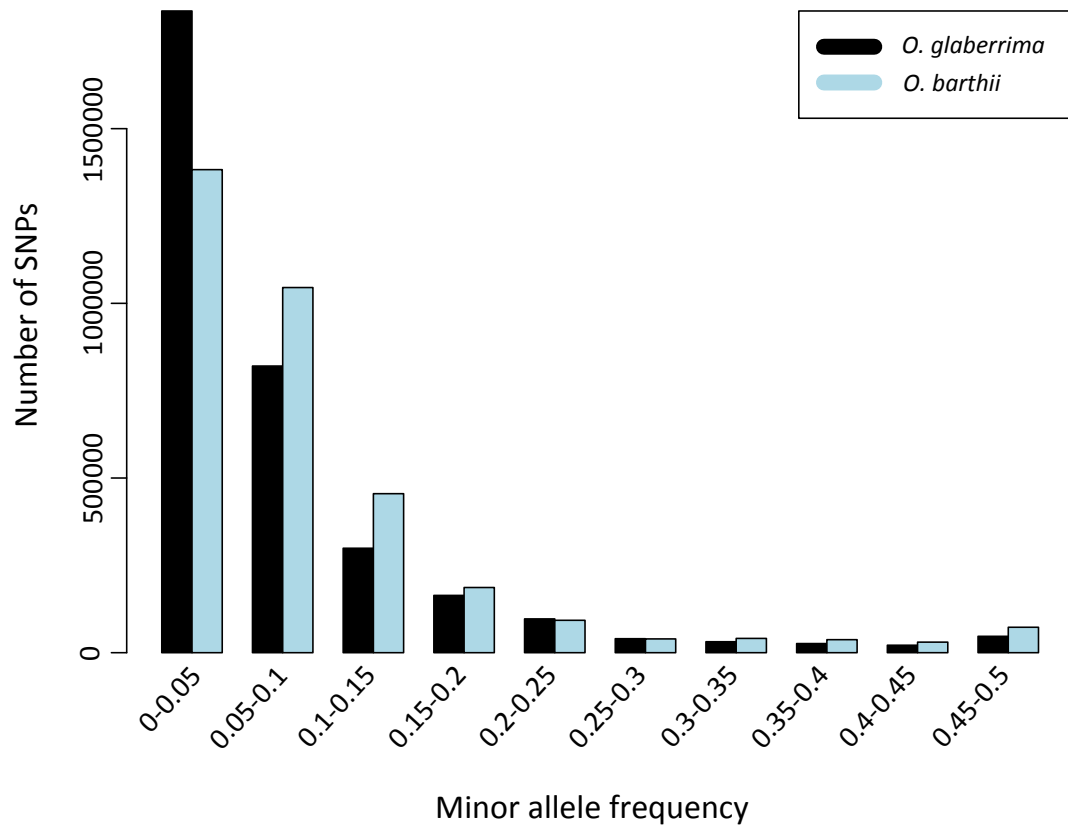

**Supplementary Figure 10** Minor allele frequency (MAF) spectrum of *O. glaberrima* and *O. barthii*.



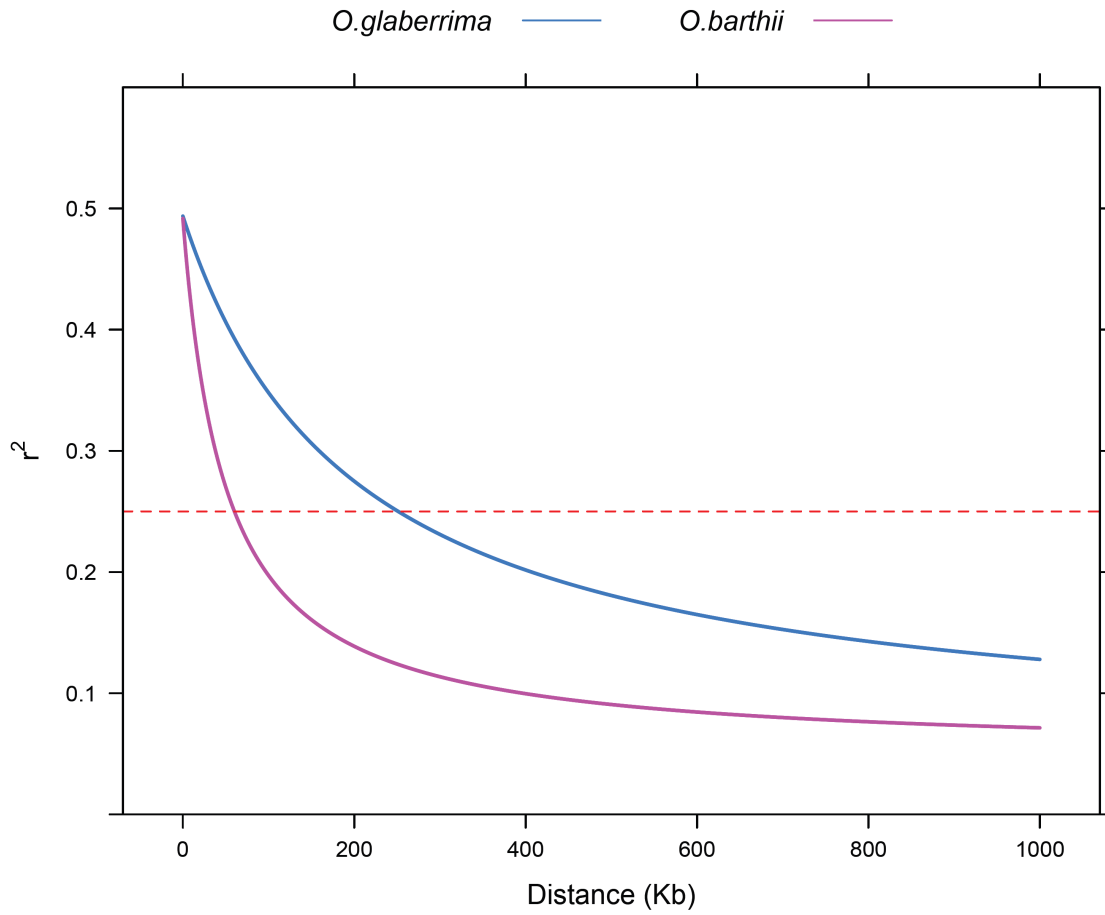

**Supplementary Figure 11** Linkage disequilibrium (LD) decay of *O. glaberrima* and *O. barthii*. The red dotted line indicates the half of the largest value of  $r^2$ .

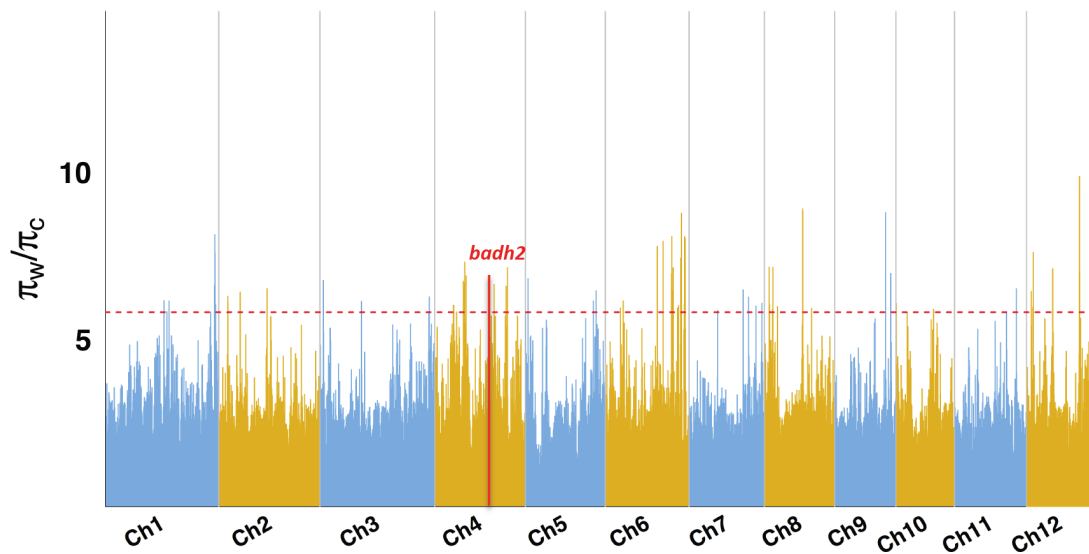

**Supplementary Figure 12** Reduction of nucleotide diversity ( $\pi$ ) between *O. glaberrima* and *O. barthii* group V (OB-V) using nonoverlapping 100 kb windows. The threshold of 2.5 percentile ( $\pi_w/\pi_c > 5.8$ ) is indicated as a red dotted line. The regions within the 2.5 percentile are considered as candidate regions under artificial selection. One orthologue of the known domestication-related gene (*badh2*), identified in *O. sativa*, was located in a candidate region on chromosome 4.

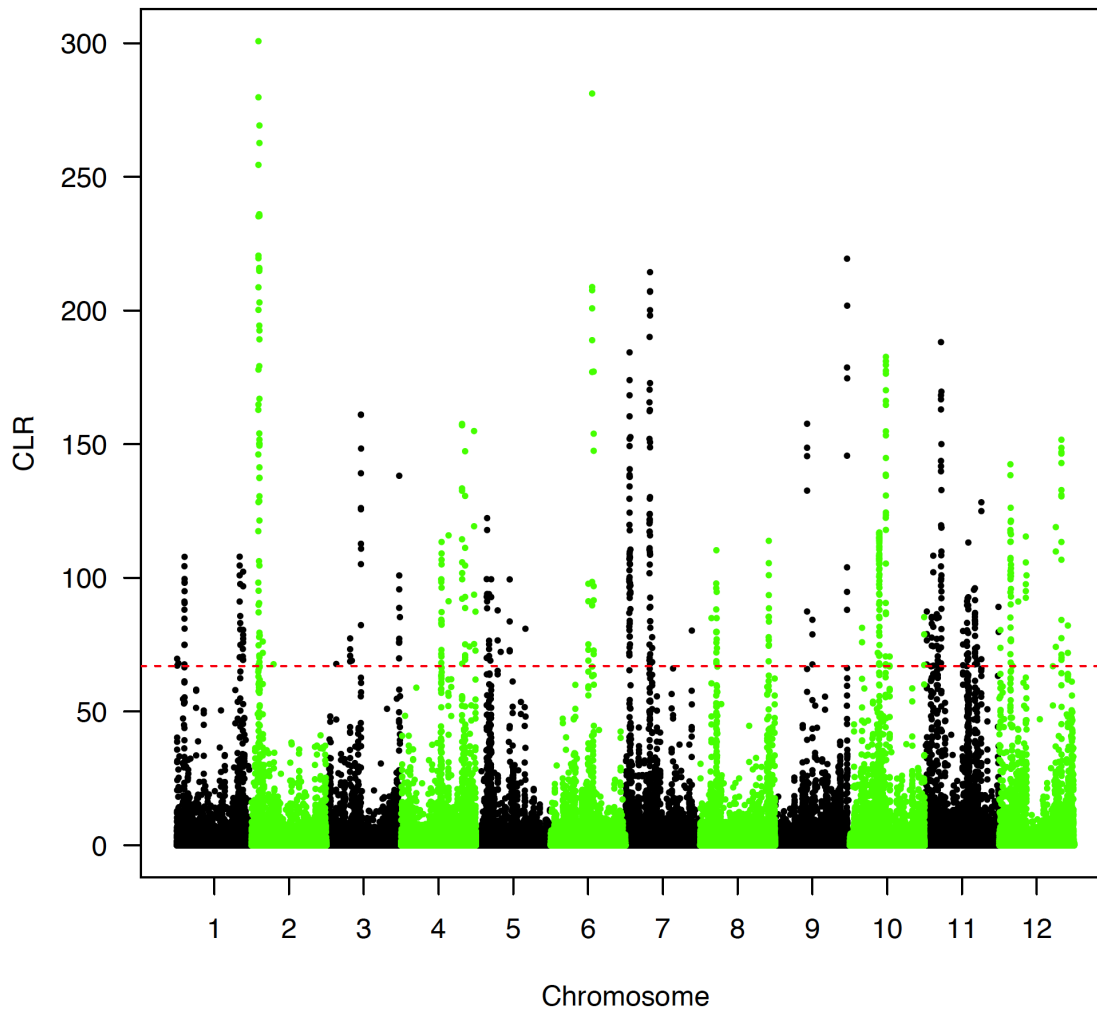

**Supplementary Figure 13** Identification of regions that have experienced recent selective sweeps in *O. barthii* subgroup OB-V. Manhattan plot of the composite likelihood ratio (CLR) across the *O. barthii* genome. The red dotted line indicates the cutoff value for the 0.5% outlier regions with significant deviations from neutrality (CLR = 66.32), indicating evidence of recent selective sweeps. Only two of the significant peaks match regions showing evidence of selective sweeps in *O. glaberrima* (Chr 4: 26.1 Mb; Chr 12: 14.4 Mb).

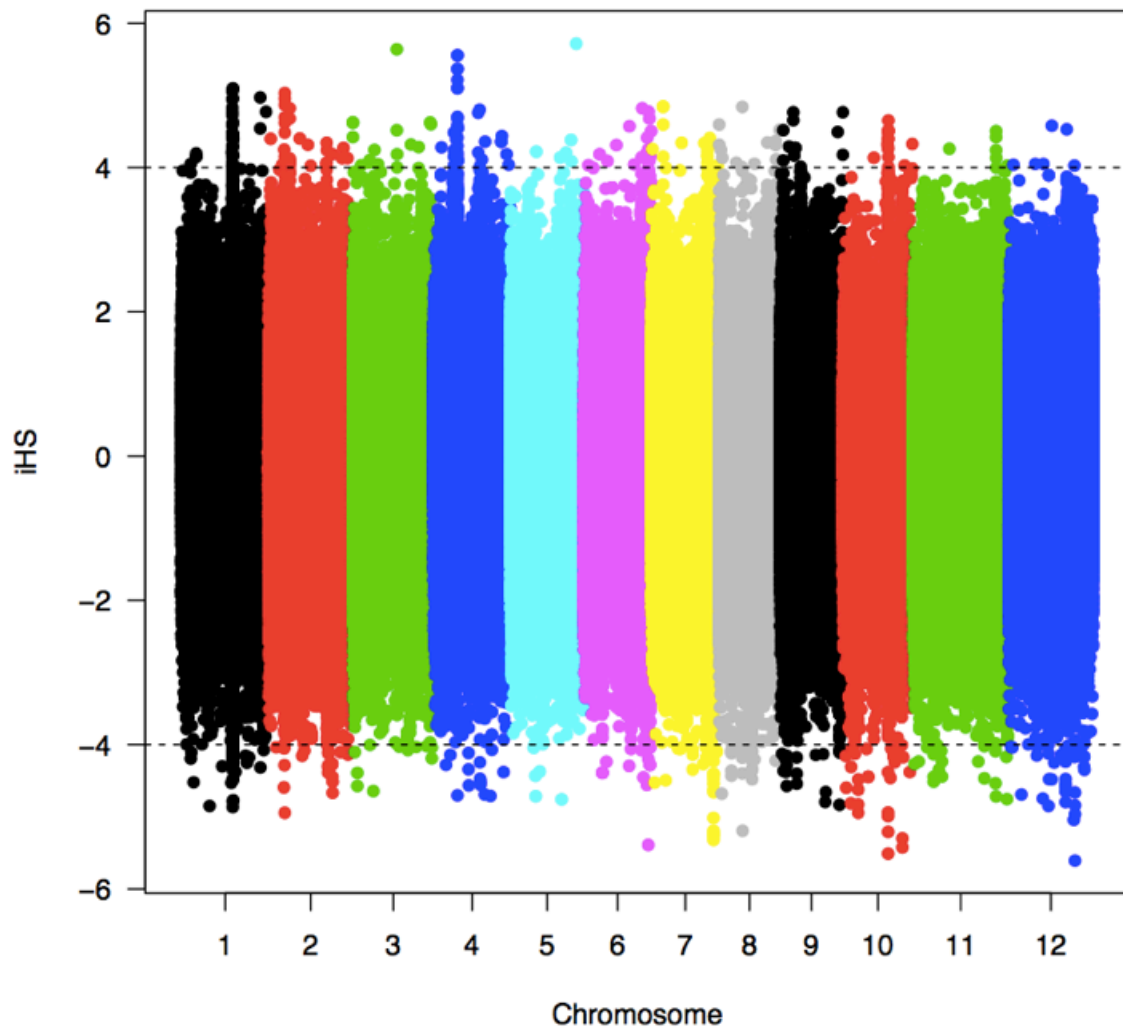

**Supplementary Figure 14** Genome-wide distribution of the *iHS* statistic in *O. glaberrima*. Large negative values of *iHS* indicate high haplotype homozygosity due to an increase in frequency of the derived allele, and positive values reflect high frequency of the ancestral allele. The dashed lines represent the cutoff for the 500 SNPs with the top  $|iHS|$  values (representing 0.028% of SNPs genome-wide).

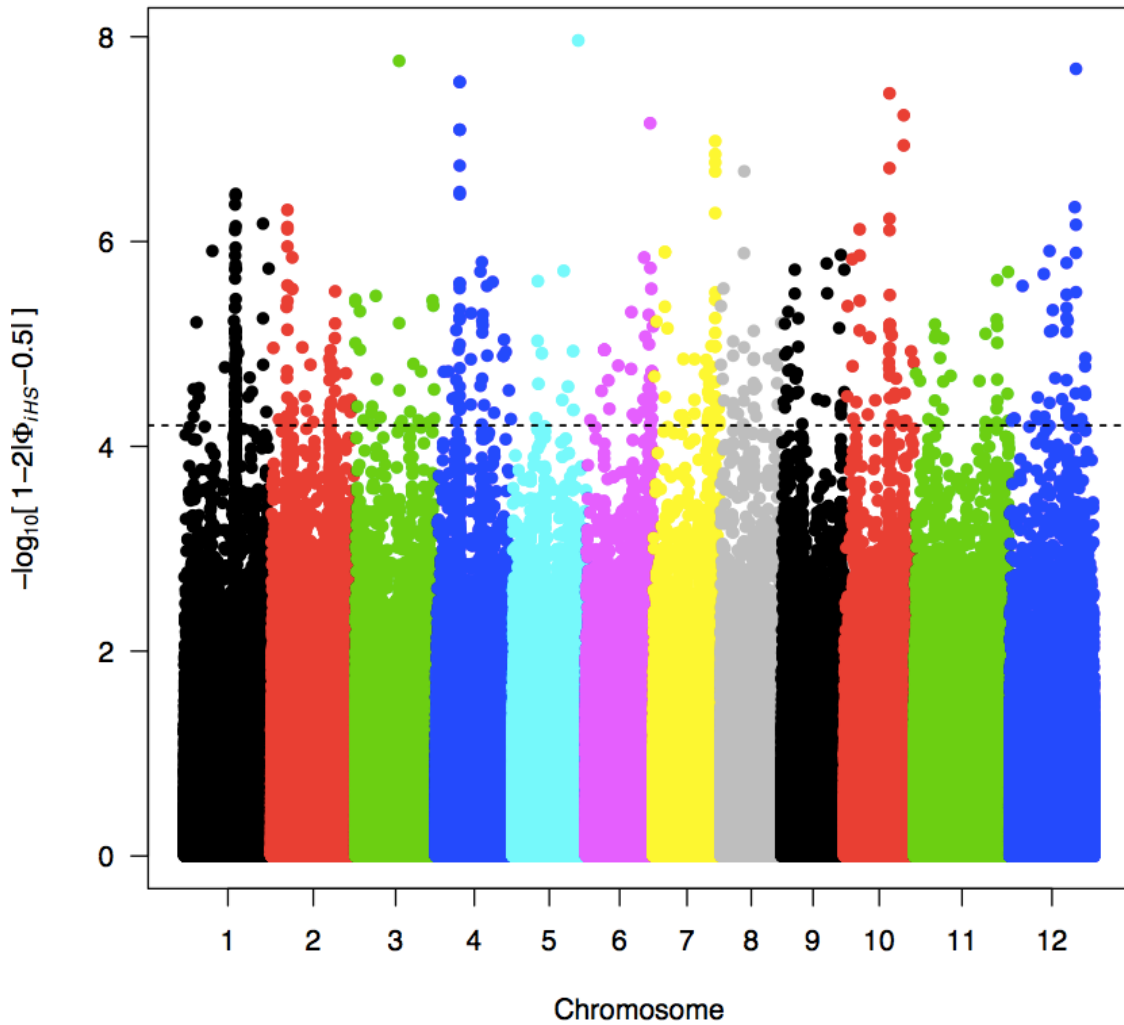

**Supplementary Figure 15** Genome-wide distribution of the *iHS* P value in *O. glaberrima*. The P value corresponds to *iHS* scores that were transformed into  $piHS = -\log[1-2|\Phi(\text{his})-0.5|]$  where  $\Phi(x)$  represents the Gaussian cumulative distribution function. Assuming *iHS* values are normally distributed (under neutrality), *piHS* is interpreted as  $\log_{10}(1/P)$  where P is the two-sided P-value associated to the neutral hypothesis of no selection. The dashed line represents the cutoff for the 500 SNPs with the top *piHS* values (representing 0.028% of SNPs genome-wide).

***O. glaberrima* vs. *O. sativa* ssp. *indica***

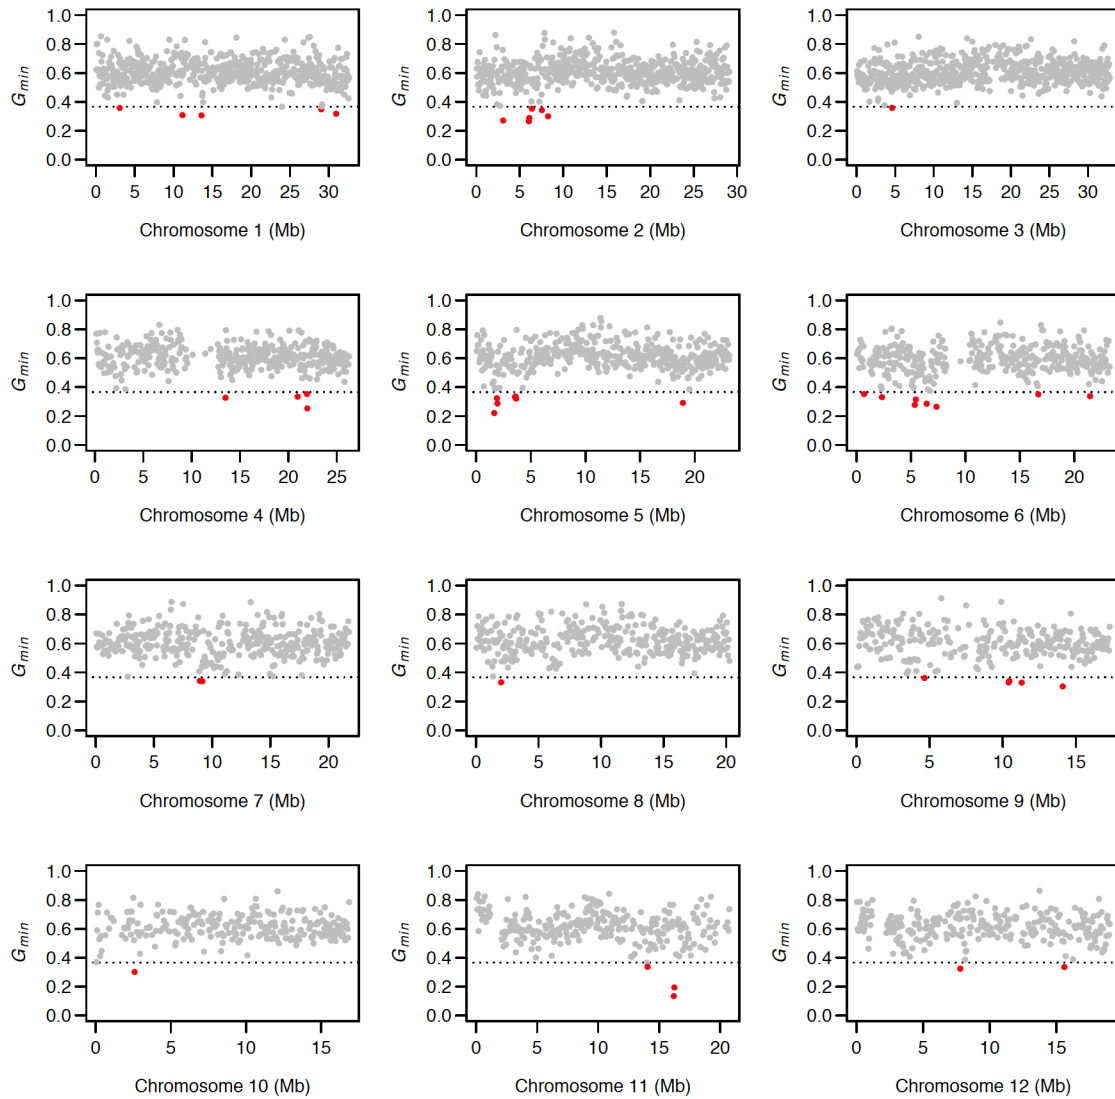

**Supplementary Figure 16A.** Plot of the  $G_{min}$  statistic in 50 kb windows across all chromosomes based on comparison of 20 *O. glaberrima* and 7 *O. sativa* ssp. *indica* resequenced accessions. Red points are in the lower 1% tail of the genome-wide distribution, also indicated by the dashed line ( $G_{min} = 0.3661$ )

***O. glaberrima* vs. *O. sativa* ssp. *japonica***

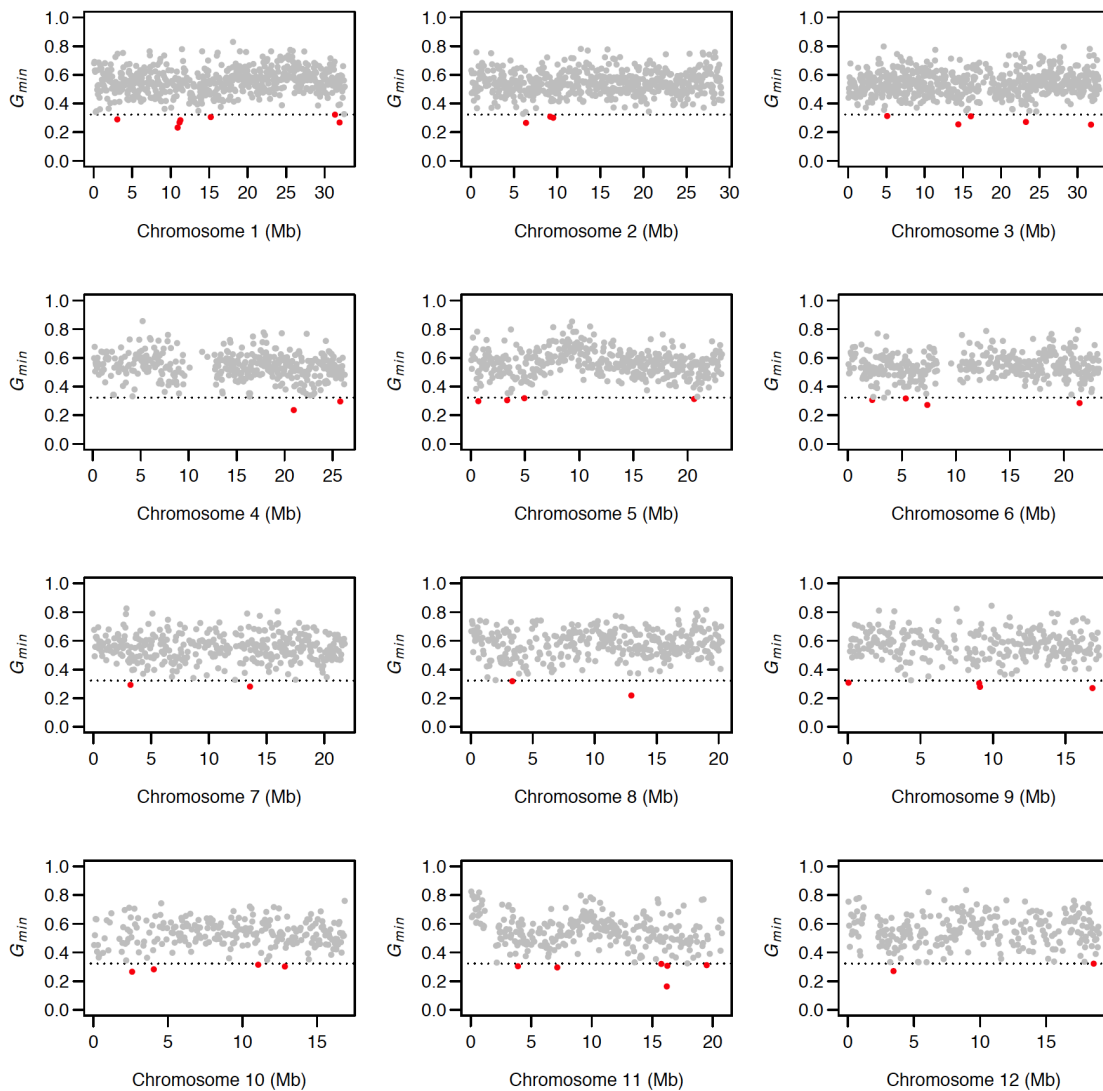

**Supplementary Figure 16B.** Plot of the  $G_{min}$  statistic in 50 kb windows across all chromosomes based on comparison of 20 *O. glaberrima* and 7 *O. sativa* ssp. *japonica* resequenced accessions. Red points are in the lower 1% tail of the genome-wide distribution, also indicated by the dashed line ( $G_{min} = 0.3225$ ).

*O. sativa* ssp. *indica* vs. *O. sativa* ssp. *japonica*

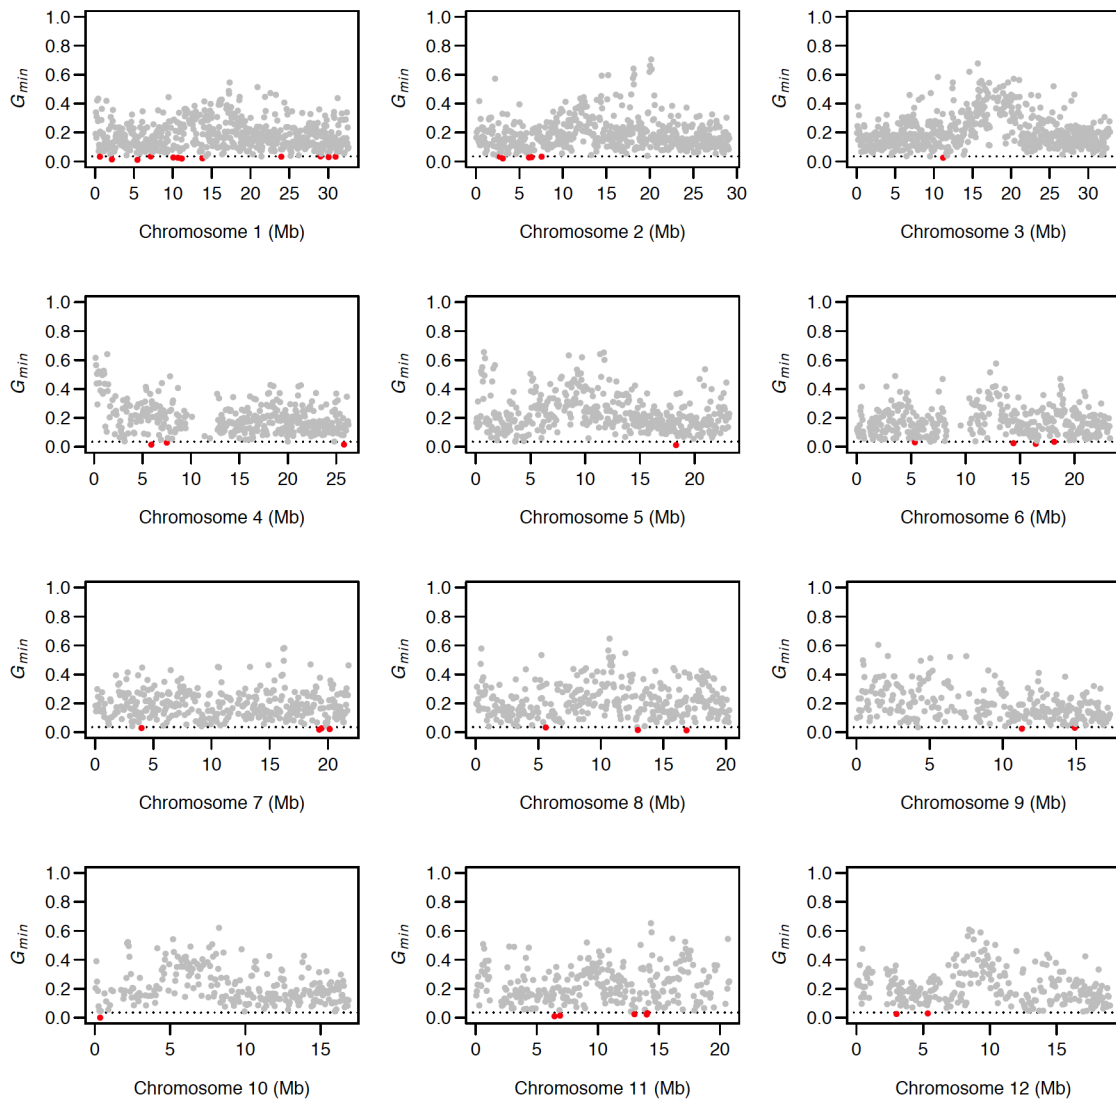

**Supplementary Figure 16C.** Plot of the  $G_{min}$  statistic in 50 kb windows across all chromosomes based on comparison of 7 *O. sativa* ssp. *indica* and 7 *O. sativa* ssp. *japonica* resequenced accessions. Red points are in the lower 1% tail of the genome-wide distribution, also indicated by the dashed line ( $G_{min} = 0.0353$ ). This figure is presented for comparison with Supplementary Figures 16A and 16B.



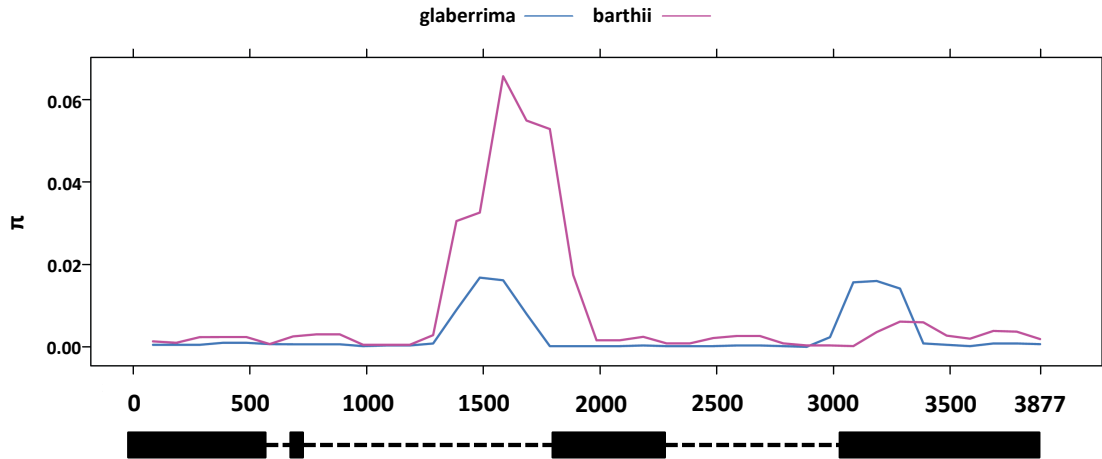

**Supplementary Figure 17** Distribution of genetic diversity ( $\pi$ ) of the *qSh1* gene between *O. glaberrima* and *O. barthii*. Genetic diversity was calculated in 300 bp sliding windows that overlap by 100 bp. The gene structure is shown below the plot.

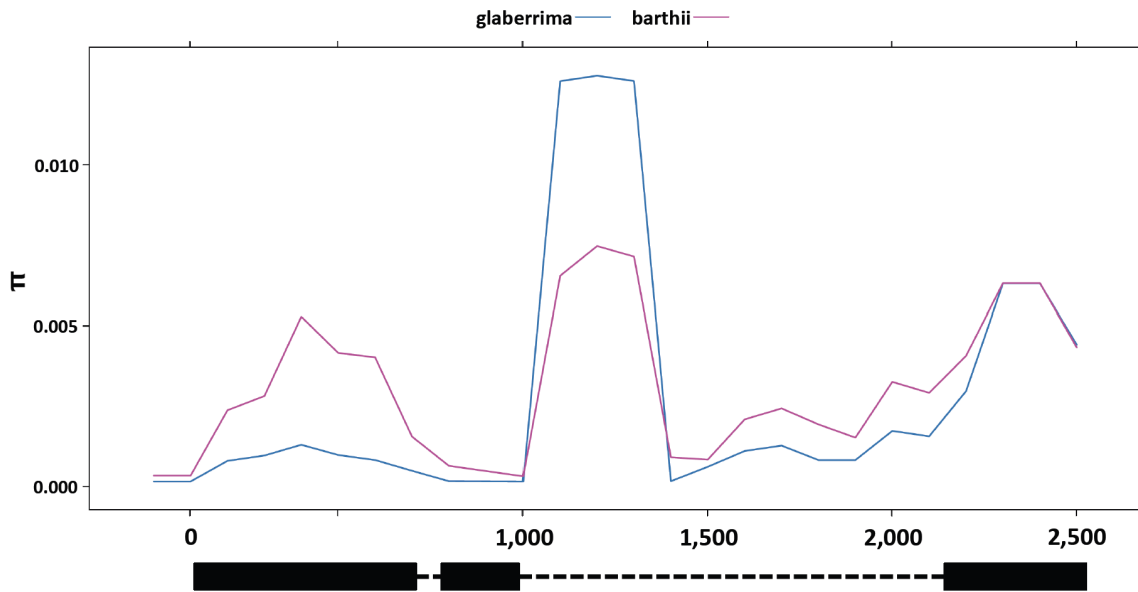

**Supplementary Figure 18** Distribution of genetic diversity ( $\pi$ ) of the *Sd1* gene between *O. glaberrima* and *O. barthii* of the *Sd1* gene. Genetic diversity was calculated in 300 bp sliding windows that are overlap by 100 bp. The gene structure is shown below the plot.

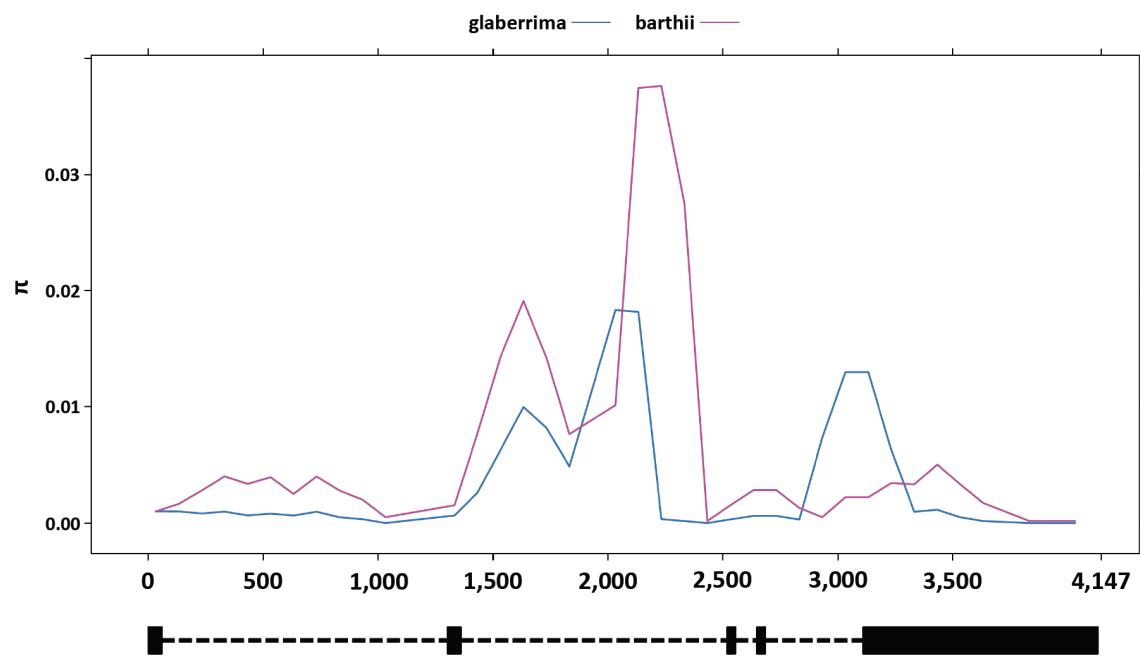

**Supplementary Figure 19** Distribution of genetic diversity ( $\pi$ ) of the *DepI* gene between *O. glaberrima* and *O. barthii*. Genetic diversity was calculated in 300 bp sliding windows that overlap by 100 bp. The gene structure is shown below the plot.

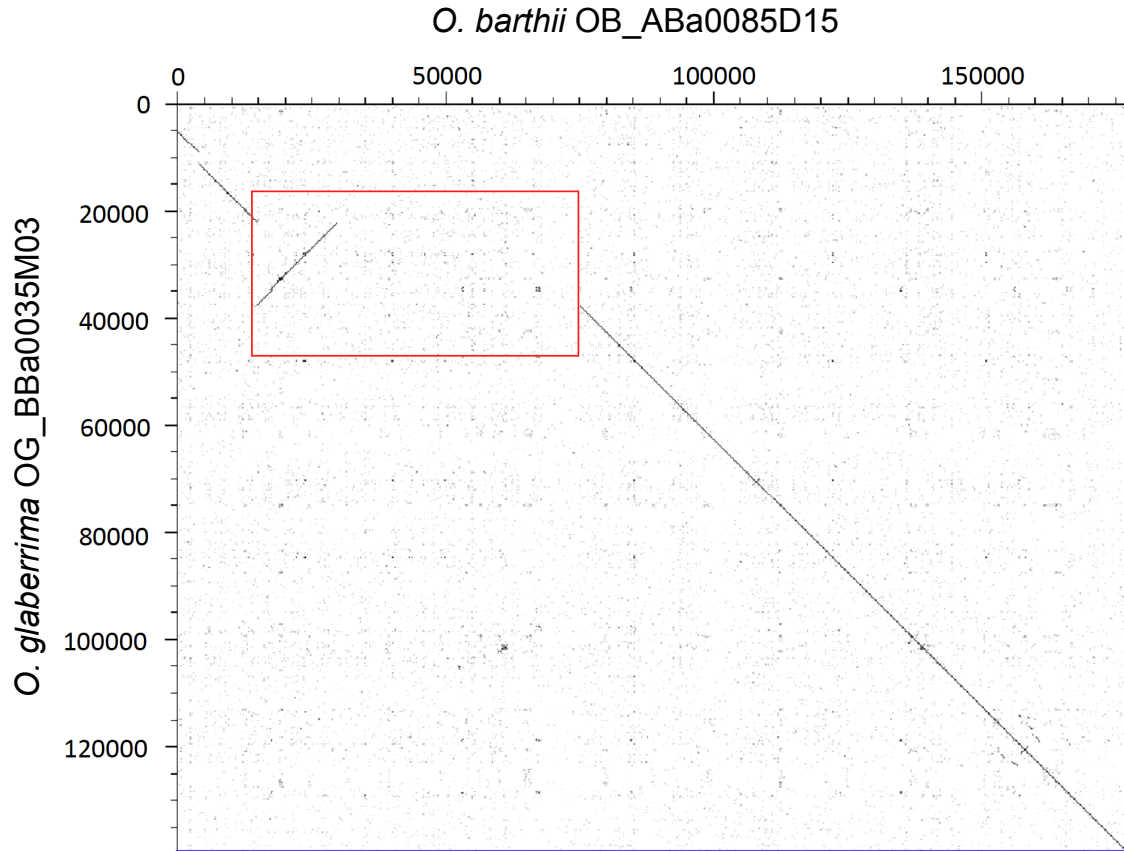

**Supplementary Figure 20** Dot plot of the sequence alignment from two BACs, OG\_BB0035M03 (*O. glaberrima*) and OB\_ABa0085D15 (*O. barthii*). The red rectangle shows a 15 kb inversion and a 45 kb deletion in *O. glaberrima*.

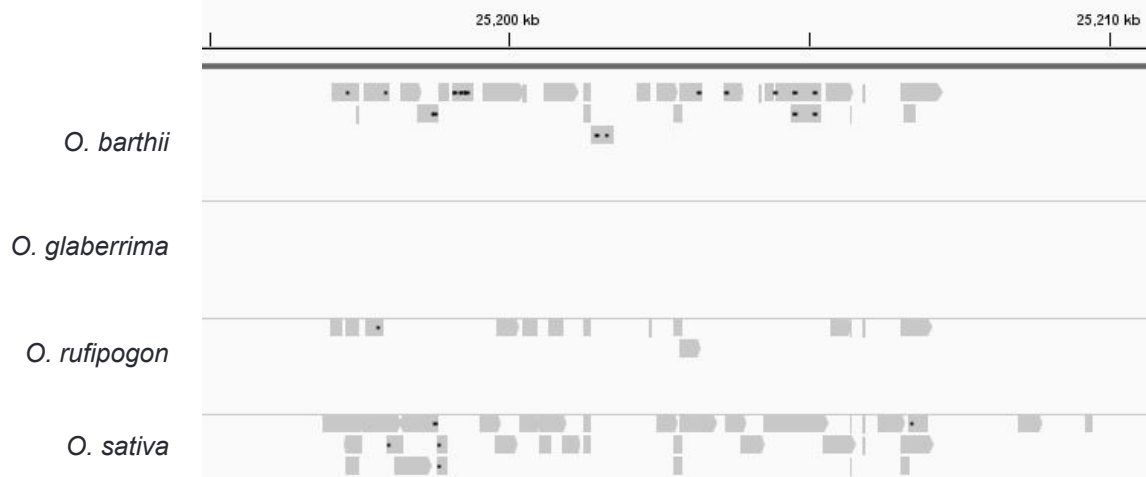

**Supplementary Figure 21** Expression pattern of the *OsSh1* gene in mixed stage panicles in *O. barthii*, *O. glaberrima*, *O. rufipogon*, and *O. sativa* ssp. *japonica*. *OsSh1* was expressed in *O. barthii*, *O. rufipogon*, and *O. sativa* ssp. *japonica* but not in *O. glaberrima*. The raw RNA sequencing (RNA-Seq) reads from the four species were assembled independently and then mapped to the *O. sativa* ssp. *japonica* reference sequence. Results of these alignments were visualized using integrated genomics viewer (IGV). Each gray bar represents one assembled RNA-Seq fragment.

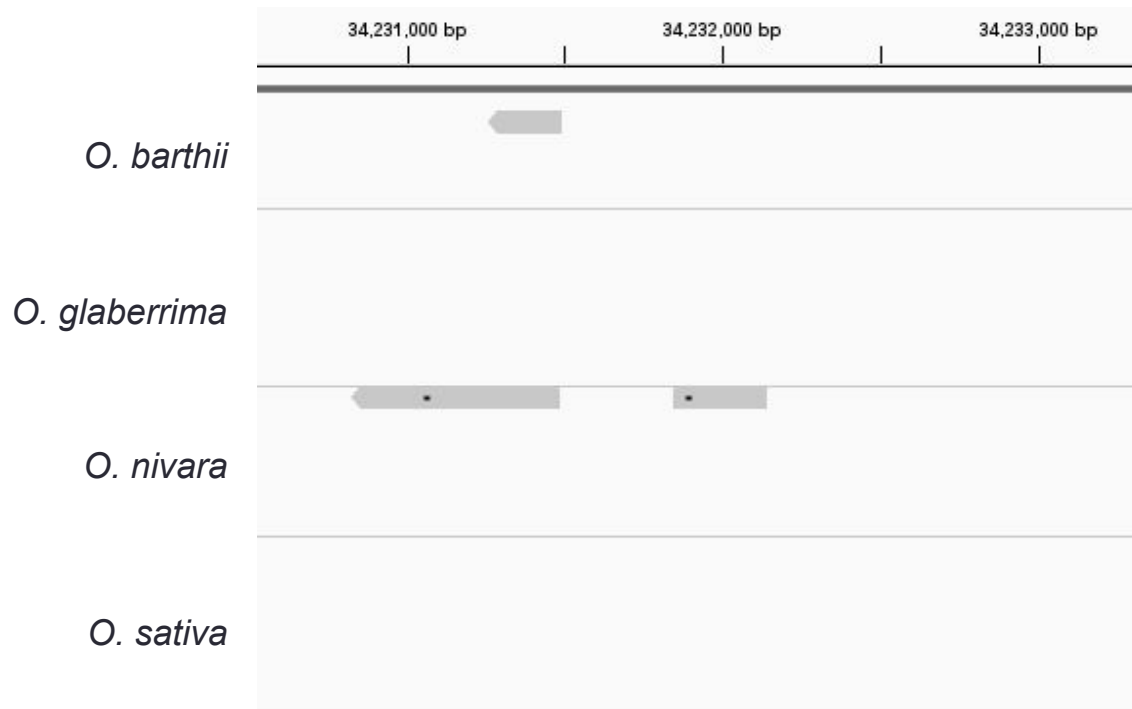

**Supplementary Figure 22** Expression pattern of *Sh4* gene in mixed stage panicles in *O. barthii*, *O. glaberrima*, *O. nivara*, and *O. sativa* ssp. *japonica*. *Sh4* was expressed in *O. barthii*, *O. nivara*, but not in *O. sativa* ssp. *japonica* and *O. glaberrima*. The raw RNA sequencing (RNA-Seq) reads from the four species were assembled independently and then mapped to the *O. sativa* ssp. *japonica* reference sequence. Results of these alignments were visualized using integrated genomics viewer (IGV). Each gray bar represents one assembled RNA-Seq fragment.

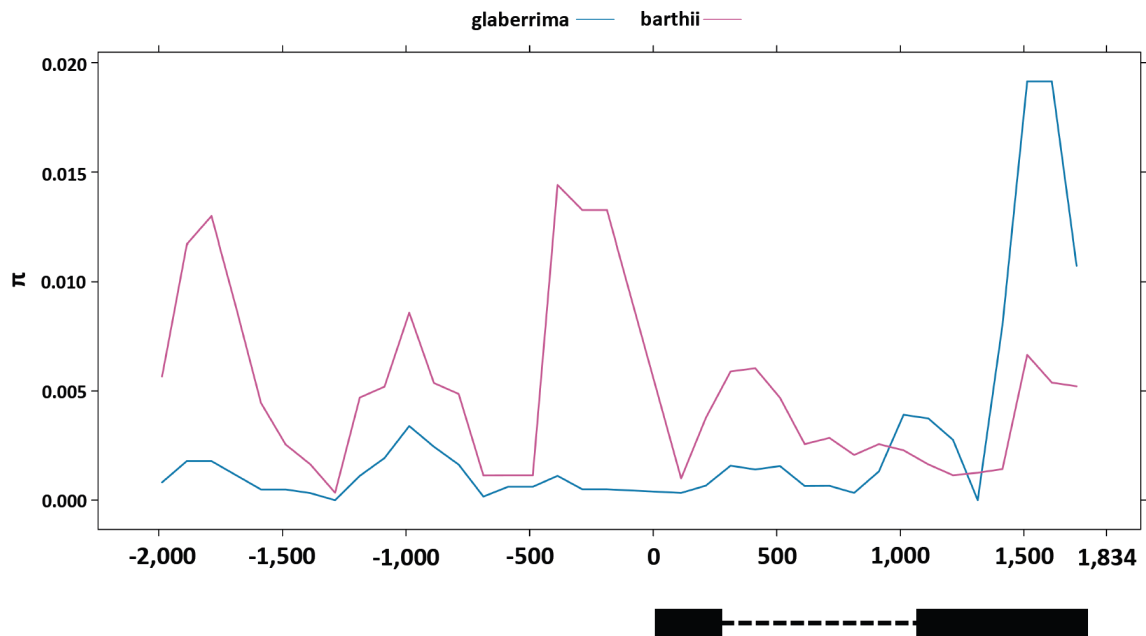

**Supplementary Figure 23** Distribution of genetic diversity ( $\pi$ ) of the *Sh4* gene between *O. glaberrima* and *O. barthii*. Genetic diversity was calculated in 300 bp sliding windows that overlap by 100 bp. The gene structure is shown below the plot.

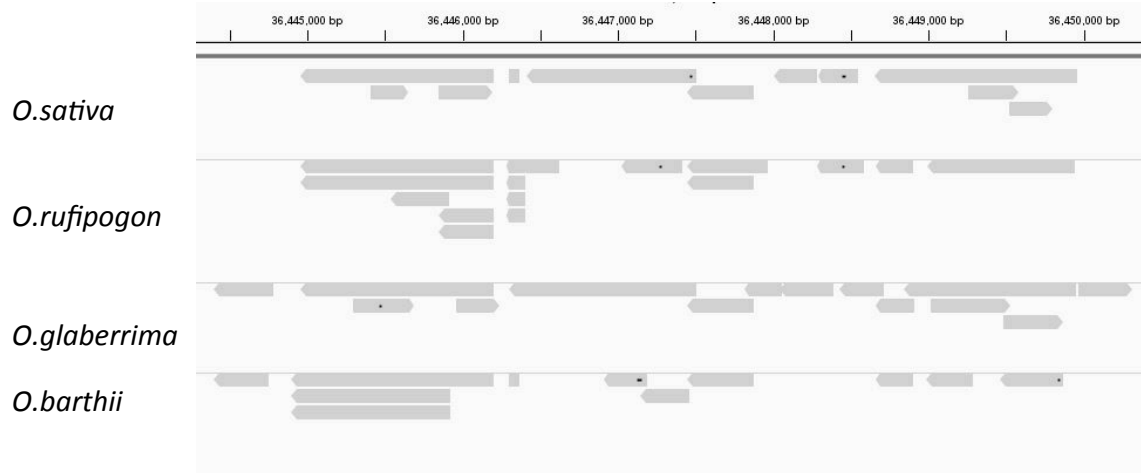

**Supplementary Figure 24** Expression pattern of the *qSh1* gene in mixed stage panicles in *O. sativa* ssp. *japonica*, *O. rufipogon*, *O. glaberrima*, and *O. barthii*. *qSh1* was expressed in all four species. The raw RNA sequencing (RNA-Seq) reads from the four species were assembled independently and then mapped to the *O. sativa* ssp. *japonica* reference sequence. Results of these alignments were visualized using integrated genome viewer (IGV). Each gray bar represents one assembled RNA-Seq fragment.



**Supplementary Table 1. Production sequencing summary of *O. glaberrima* genome**

| Chr          | # BAC pools | BAC pool shotgun  |                 |             | Paired end (3kb) |             |
|--------------|-------------|-------------------|-----------------|-------------|------------------|-------------|
|              |             | # reads           | Mb              | SeqCov      | # reads          | PhyCov      |
| 1            | 13          | 3,128,847         | 962.94          | 22.3        | 991,322          | 34.4        |
| 2            | 11          | 2,790,111         | 901.06          | 25.1        | 511,558          | 21.3        |
| 3            | 6           | 2,771,920         | 982.82          | 54.3        | 433,497          | 36.1        |
| 4            | 11          | 2,153,556         | 751.04          | 21.2        | 529,294          | 22.4        |
| 5            | 9           | 2,011,749         | 753.08          | 25.3        | 387,732          | 19.6        |
| 6            | 10          | 3,265,626         | 1,099.70        | 35.8        | 361,325          | 17.6        |
| 7            | 10          | 4,258,849         | 1,122.59        | 37.9        | 834,476          | 33.8        |
| 8            | 10          | 3,833,583         | 986.57          | 34.7        | 793,834          | 33.5        |
| 9            | 8           | 1,996,521         | 581.41          | 25.6        | 741,616          | 39.2        |
| 10           | 8           | 1,958,453         | 732.57          | 32.3        | 439,512          | 29.1        |
| 11           | 10          | 2,119,388         | 792.21          | 27.9        | 380,534          | 20.1        |
| 12           | 9           | 1,460,208         | 570.69          | 20.7        | 382,199          | 20.8        |
| WGS          |             | 5,623,228         | 2,203.4         | 5.5         |                  |             |
| <b>Total</b> | <b>115</b>  | <b>37,372,039</b> | <b>12,440.1</b> | <b>31.1</b> | <b>6,786,899</b> | <b>22.0</b> |

**Supplementary Table 2. Assembly statistics for the *O. glaberrima* genome sequence**

| Chromosome | Contig No. | Contig N50<br>(bp) | Scaffold no. |        | Scaffold N50<br>(bp) | Chromosome Size<br>(bp) |
|------------|------------|--------------------|--------------|--------|----------------------|-------------------------|
|            |            |                    | All          | >500kb |                      |                         |
| 1          | 4661       | 19589              | 399          | 11     | 248470               | 34175486                |
| 2          | 5189       | 17013              | 835          | 4      | 183020               | 31644697                |
| 3          | 3661       | 20200              | 321          | 5      | 270287               | 35155656                |
| 4          | 3924       | 20502              | 451          | 7      | 180503               | 28085285                |
| 5          | 2634       | 27937              | 238          | 10     | 279325               | 23673821                |
| 6          | 4679       | 24486              | 686          | 5      | 186350               | 28779073                |
| 7          | 4073       | 19257              | 322          | 11     | 350076               | 25886956                |
| 8          | 3920       | 18484              | 348          | 7      | 305750               | 24024543                |
| 9          | 4025       | 13997              | 377          | 2      | 156364               | 19373526                |
| 10         | 2596       | 29139              | 240          | 5      | 266416               | 18658832                |
| 11         | 5021       | 15802              | 522          | 2      | 145504               | 24070662                |
| 12         | 6197       | 13316              | 570          | 2      | 152076               | 22555237                |

**Supplementary Table 3. *O. glaberrima* assembly statistics for mapped and unmapped scaffolds**

| Chromosome | Mapped       |              |                   | UnMapped     |              |                   | Sequence ordered and oriented (%) |
|------------|--------------|--------------|-------------------|--------------|--------------|-------------------|-----------------------------------|
|            | Scaffold No. | Scaffold N50 | Chromosome Length | Scaffold No. | Scaffold N50 | Chromosome Length |                                   |
| 1          | 319          | 257774       | 32581612          | 80           | 86638        | 1593874           | 95.33                             |
| 2          | 456          | 203532       | 29097369          | 379          | 8398         | 2547328           | 91.95                             |
| 3          | 201          | 272213       | 33033699          | 120          | 59999        | 2121957           | 93.96                             |
| 4          | 329          | 198126       | 26266211          | 122          | 35260        | 1819074           | 93.52                             |
| 5          | 177          | 296234       | 23175214          | 61           | 14164        | 498601            | 97.89                             |
| 6          | 392          | 200552       | 24135385          | 294          | 33500        | 4643688           | 83.86                             |
| 7          | 158          | 368856       | 21783724          | 164          | 128781       | 4103232           | 84.14                             |
| 8          | 194          | 307545       | 20273431          | 154          | 142929       | 3751112           | 84.38                             |
| 9          | 272          | 168307       | 17580332          | 105          | 48487        | 1793184           | 90.74                             |
| 10         | 142          | 275935       | 16896573          | 98           | 48131        | 1762259           | 90.55                             |
| 11         | 357          | 163730       | 19804601          | 164          | 57063        | 3309911           | 85.68                             |
| 12         | 372          | 159501       | 19117423          | 198          | 77405        | 3437818           | 85.75                             |

**Supplementary Table 4. Evaluation of *O. glaberrima* final assembly using four Sanger sequenced BACs**

| BAC ID | Query        | Genbank accession       | BAC length | Query start | Query end    | Subject Chromosome | Subject start | Subject end | Query align length | Subject align length | %I      |         |       |       |     |
|--------|--------------|-------------------------|------------|-------------|--------------|--------------------|---------------|-------------|--------------------|----------------------|---------|---------|-------|-------|-----|
| BAC1   | OB_BB0048H17 | AC211606.1              | 120667     | 1           | 17280        | Chr01              | 1514320       | 1531594     | 17280              | 17275                | 99.     |         |       |       |     |
|        |              |                         |            | 17331       | 59109        | Chr01              | 1531977       | 1573747     | 41779              | 41771                | 99      |         |       |       |     |
|        |              |                         |            | 59141       | 59944        | Chr01              | 1573991       | 1574794     | 804                | 804                  | 99.     |         |       |       |     |
|        |              |                         |            | 60119       | 62811        | Chr01              | 1575050       | 1577742     | 2693               | 2693                 | 99.     |         |       |       |     |
|        |              |                         |            | 62793       | 73571        | Chr01              | 1577993       | 1588771     | 10779              | 10779                | 99.     |         |       |       |     |
|        |              |                         |            | 73744       | 78039        | Chr01              | 1589303       | 1593599     | 4296               | 4297                 | 99.     |         |       |       |     |
|        |              |                         |            | 78884       | 80817        | Chr01              | 1594231       | 1596160     | 1934               | 1930                 | 99.     |         |       |       |     |
|        |              |                         |            | 80878       | 80949        | Chr01              | 1597129       | 1597200     | 72                 | 72                   | 10      |         |       |       |     |
| BAC2   | OB_BB0090P20 | AC211289.1<br>2 contigs | 144149     | 1           | 13897        | Chr05              | 7153512       | 7139616     | 13897              | 13897                | 99.     |         |       |       |     |
|        |              |                         |            | 14194       | 22925        | Chr05              | 7139447       | 7130717     | 8732               | 8731                 | 99.     |         |       |       |     |
|        |              |                         |            | 22945       | 24055        | Chr05              | 7130336       | 7129228     | 1111               | 1109                 | 99.     |         |       |       |     |
|        |              |                         |            | 24179       | 46136        | Chr05              | 7129097       | 7107142     | 21958              | 21956                | 99.     |         |       |       |     |
|        |              |                         |            | 46246       | 128969       | Chr05              | 7106582       | 7023897     | 82724              | 82686                | 99.     |         |       |       |     |
|        |              |                         |            | 129002      | 144149       | Chr05              | 7023767       | 7008620     | 15148              | 15148                | 10      |         |       |       |     |
|        |              |                         |            | BAC3        | OG_BB0066E18 | FP340545.1         | 127790        | 1           | 24800              | Chr06                | 1948614 | 1923819 | 24800 | 24796 | 99. |
|        |              |                         |            |             |              |                    |               | 25579       | 31510              | Chr06                | 1922882 | 1916951 | 5932  | 5932  | 10  |
| 32052  | 62356        | Chr06                   | 1916437    |             |              |                    |               | 1886138     | 30305              | 30300                | 99.     |         |       |       |     |
| 62962  | 82013        | Chr06                   | 1885748    |             |              |                    |               | 1866697     | 19052              | 19052                | 10      |         |       |       |     |
| 82081  | 127790       | Chr06                   | 1866152    |             |              |                    |               | 1820456     | 45710              | 45697                | 99.     |         |       |       |     |
| BAC4   | OG_BB0049I08 | FP340543.1              | 164664     | 1           | 4434         | Chr06              | 2130509       | 2126076     | 4434               | 4434                 | 99.     |         |       |       |     |
|        |              |                         |            | 5603        | 65887        | Chr06              | 2125001       | 2064727     | 60285              | 60275                | 99.     |         |       |       |     |

|        |        |       |         |         |       |       |     |
|--------|--------|-------|---------|---------|-------|-------|-----|
| 65832  | 73633  | Chr06 | 2064138 | 2056338 | 7802  | 7801  | 99. |
| 73770  | 147041 | Chr06 | 2055931 | 1982684 | 73272 | 73248 | 99. |
| 147068 | 158134 | Chr06 | 1982465 | 1971398 | 11067 | 11068 | 99. |
| 159930 | 164664 | Chr06 | 1970272 | 1965539 | 4735  | 4734  | 99. |

---

**Supplementary Table 7. Number of WRKY family genes in *O. sativa* ssp. *japonica* and *O. glaberrima* genomes**

| Chromosome | <i>O. sativa</i> ssp. <i>japonica</i> |            | <i>O. glaberrima</i> |            |
|------------|---------------------------------------|------------|----------------------|------------|
|            | Number of genes                       | Percentage | Number of genes      | Percentage |
| 1          | 24                                    | 23.53%     | 20                   | 21.74%     |
| 2          | 6                                     | 5.88%      | 6                    | 6.52%      |
| 3          | 11                                    | 10.78%     | 10                   | 10.87%     |
| 4          | 5                                     | 4.90%      | 5                    | 5.43%      |
| 5          | 19                                    | 18.63%     | 15                   | 16.30%     |
| 6          | 4                                     | 3.92%      | 5                    | 5.43%      |
| 7          | 5                                     | 4.90%      | 5                    | 5.43%      |
| 8          | 4                                     | 3.92%      | 3                    | 3.26%      |
| 9          | 5                                     | 4.90%      | 5                    | 5.43%      |
| 10         | 2                                     | 1.96%      | 2                    | 2.17%      |
| 11         | 8                                     | 7.84%      | 9                    | 9.78%      |
| 12         | 9                                     | 8.82%      | 7                    | 7.61%      |
| Unplaced   | -                                     | -          | -                    | -          |
| Total      | 102                                   |            | 92                   |            |

**Supplementary Table 8. Distribution of WRKY gene groups in the *O. sativa* ssp. *japonica* and *O. glaberrima* genomes**

| <b>WRKY</b> | <b>Motif</b>                                                           | <b><i>O. sativa</i> ssp.<br/><i>japonica</i></b> | <b><i>O. glaberrima</i></b> |
|-------------|------------------------------------------------------------------------|--------------------------------------------------|-----------------------------|
| Group I a   | WRKY-C <sub>2</sub> H <sub>2</sub> /WRKY-C <sub>2</sub> H <sub>2</sub> | 10                                               | 9                           |
| Group I b   | WRKY-C <sub>2</sub> HC/WRKY-C <sub>2</sub> HC                          | 0                                                | 0                           |
| Group II    | WRKY-C <sub>2</sub> H <sub>2</sub>                                     | 56                                               | 44                          |
| Group III   | WRKY-C <sub>2</sub> HC                                                 | 27                                               | 23                          |
| Group IV a  | WRKY-C <sub>2</sub> XX                                                 | 5                                                | 1                           |
| Group IV b  | WRKY                                                                   | 3                                                | 2                           |
| Truncated   |                                                                        | 0                                                | 9                           |
| Pseudogene  |                                                                        | 1                                                | 4                           |
| Total       |                                                                        | 102                                              | 92                          |

**Supplementary Table 10. Deletion status of 8 missing genes in the comparative analysis of flowering time, light response, and WRKY genes in the *O. glaberrima* genome assembly and RNA expression data**

| No. | Gene name<br>( <i>Arabidopsis thaliana</i> ) | Gene name<br>( <i>O. sativa</i> ) | Locus ID<br>( <i>O. sativa ssp. japonica</i> ) | Genome<br>assembly | RNA-Seq<br>alignment |
|-----|----------------------------------------------|-----------------------------------|------------------------------------------------|--------------------|----------------------|
| 1   | <i>GI</i>                                    | -                                 | LOC_Os01g08700                                 | No                 | Yes                  |
| 2   | <i>ARP6</i>                                  | -                                 | LOC_Os01g16414                                 | No                 | Yes                  |
| 3   | <i>CO</i>                                    | <i>Hd1</i>                        | LOC_Os06g16370                                 | No                 | No                   |
| 4   | <i>RFT1</i>                                  | -                                 | LOC_Os07g30250                                 | No                 | Yes                  |
| 5   | <i>SPL3</i>                                  | <i>SPL13</i>                      | LOC_Os07g32170                                 | No                 | Yes                  |
| 6   | <i>PIF3</i>                                  | <i>OsPIL15</i>                    | Os01g0286200                                   | No                 | Yes                  |
| 7   | -                                            | <i>WRKY77</i>                     | LOC_Os01g40260                                 | No                 | Yes                  |
| 8   |                                              | <i>WRKY</i>                       | LOC_Os08g17400                                 | No                 | Yes                  |



**Supplementary Table 11. Summary of annotated repeats in *O. glaberrima* in comparison with *O. sativa***

|                                              | <i>O. glaberrima</i> Unplaced scaffolds |              | <i>O. glaberrima</i> Placed scaffolds |              | <i>O. glaberrima</i> Total |              | <i>O. sativa</i> |              |
|----------------------------------------------|-----------------------------------------|--------------|---------------------------------------|--------------|----------------------------|--------------|------------------|--------------|
|                                              | bp                                      | %            | bp                                    | %            | bp                         | %            | bp               | %            |
| <b>Total length (excluding Ns)</b>           | 29683365                                |              | 273629535                             |              | 303312900                  |              | 372793407        |              |
| <b>bases masked</b>                          | 12184150                                | <b>41.05</b> | 91715285                              | <b>33.52</b> | 103899435                  | <b>34.25</b> | 155950693        | <b>41.83</b> |
| <b>SINEs</b>                                 | 87897                                   | <b>0.3</b>   | 935520                                | <b>0.34</b>  | 1023417                    | <b>0.34</b>  | 1169553          | <b>0.31</b>  |
| <b>LINEs</b>                                 | 350929                                  | <b>1.18</b>  | 3651968                               | <b>1.33</b>  | 4002897                    | <b>1.32</b>  | 4563747          | <b>1.22</b>  |
| <b>Ty1-copia</b>                             | 920904                                  | <b>3.1</b>   | 7270849                               | <b>2.66</b>  | 8191753                    | <b>2.7</b>   | 10620343         | <b>2.85</b>  |
| <b>Ty3-gypsy</b>                             | 4861777                                 | <b>16.38</b> | 26701823                              | <b>9.76</b>  | 31563600                   | <b>10.41</b> | 56323148         | <b>15.11</b> |
| <b>LTR-RT Unclassified</b>                   | 1373726                                 | <b>4.63</b>  | 9379202                               | <b>3.43</b>  | 10752928                   | <b>3.55</b>  | 15599470         | <b>4.18</b>  |
| <b>LTR-RT (Total)</b>                        | 7156407                                 | <b>24.11</b> | 43351874                              | <b>15.84</b> | 50508281                   | <b>16.65</b> | 82542961         | <b>22.14</b> |
| <b>MuDR</b>                                  | 230792                                  | <b>0.78</b>  | 1983187                               | <b>0.72</b>  | 2213979                    | <b>0.73</b>  | 4572034          | <b>1.23</b>  |
| <b>EnSPM</b>                                 | 282399                                  | <b>0.95</b>  | 1821224                               | <b>0.67</b>  | 2103623                    | <b>0.69</b>  | 5623429          | <b>1.51</b>  |
| <b>hAT</b>                                   | 102536                                  | <b>0.35</b>  | 910674                                | <b>0.33</b>  | 1013210                    | <b>0.33</b>  | 1295672          | <b>0.35</b>  |
| <b>Other classes</b>                         | 1456044                                 | <b>4.91</b>  | 13137445                              | <b>4.8</b>   | 14593489                   | <b>4.81</b>  | 19576924         | <b>5.25</b>  |
| <b>Unclassified</b>                          | 317839                                  | <b>1.07</b>  | 3477453                               | <b>1.27</b>  | 3795292                    | <b>1.25</b>  | 4616171          | <b>1.24</b>  |
| <b>DNA TE</b>                                | 2389610                                 | <b>8.05</b>  | 21329983                              | <b>7.8</b>   | 23719593                   | <b>7.82</b>  | 35684230         | <b>9.57</b>  |
| <b>(Total-excluding Helitrons and MITEs)</b> |                                         |              |                                       |              |                            |              |                  |              |
| <b>MITEs</b>                                 | 1357389                                 | <b>4.57</b>  | 15530483                              | <b>5.68</b>  | 16887872                   | <b>5.57</b>  | 19534724         | <b>5.24</b>  |
| <b>HELITRONS</b>                             | 433961                                  | <b>1.46</b>  | 4498010                               | <b>1.64</b>  | 4931971                    | <b>1.63</b>  | 6746709          | <b>1.81</b>  |
| <b>Unclassified</b>                          | 407957                                  | <b>1.37</b>  | 2417447                               | <b>0.27</b>  | 2825404                    | <b>0.93</b>  | 5708769          | <b>1.53</b>  |

**Supplementary Table 12. TE fragments inside predicted genes in *O. glaberrima***

| <b>Repeat Type</b> | <b>Count</b> |
|--------------------|--------------|
| MITE               | 9685         |
| UNKNOWN            | 558          |
| DNA_TE             | 2112         |
| Helitron           | 149          |
| SINE               | 508          |
| LINE               | 421          |
| LTR-RT             | 2703         |

**Supplementary Table 13. Comparison of LTR-RT insertion times in *O. sativa* and *O. glaberrima***

| <b>MYA</b> | <b><i>O. glaberrima</i> (%)</b> | <b><i>O. sativa</i> (%)</b> |
|------------|---------------------------------|-----------------------------|
| <1         | 29.18                           | 65.54                       |
| 1-2        | 50.52                           | 24.29                       |
| 2-3        | 15.17                           | 6.38                        |
| >3         | 5.13                            | 3.8                         |

**Supplementary Table 14. *O. barthii* accessions sequenced for population structure analysis\***

| <b>No.</b> | <b>Accession No.</b> | <b>Country of Origin</b> | <b>No.</b> | <b>Accession No.</b> | <b>Country of Origin</b> | <b>No.</b> | <b>Accession No.</b> | <b>Country of Origin</b> |
|------------|----------------------|--------------------------|------------|----------------------|--------------------------|------------|----------------------|--------------------------|
| 1          | WAB0029000           | Botswana                 | 33         | WAB0028957           | Guinea                   | 65         | WAB0028877           | Niger                    |
| 2          | IRGC105608           | Cameroon                 | 34         | WAB0028876           | Guinea                   | 66         | IRGC101381           | Niger                    |
| 3          | WAB0028942           | Cameroon                 | 35         | WAB0028956           | Guinea                   | 67         | IRGC104084           | Nigeria                  |
| 4          | WAB0028983           | Cameroon                 | 36         | WAB0028889           | Guinea                   | 68         | WAB0028987           | Nigeria                  |
| 5          | WAB0028947           | Cameroon                 | 37         | IRGC100931           | Mali                     | 69         | WAB0028996           | Nigeria                  |
| 6          | WAB0009240           | Cameroon                 | 38         | IRGC100934           | Mali                     | 70         | WAB0028997           | Nigeria                  |
| 7          | WAB0028993           | Cameroon                 | 39         | WAB0028896           | Mali                     | 71         | WAB0028994           | Nigeria                  |
| 8          | WAB0028944           | Cameroon                 | 40         | WAB0028875           | Mali                     | 72         | WAB0024904           | Nigeria                  |
| 9          | WAB0028946           | Cameroon                 | 41         | WAB0028961           | Mali                     | 73         | WAB0026769           | Nigeria                  |
| 10         | WAB0028948           | Cameroon                 | 42         | WAB0028975           | Mali                     | 74         | WAB0026770           | Nigeria                  |
| 11         | WAB0028882           | Cameroon                 | 43         | WAB0028980           | Mali                     | 75         | WAB0028937           | Nigeria                  |
| 12         | WAB0028884           | Cameroon                 | 44         | WAB0028897           | Mali                     | 76         | WAB0009239           | Nigeria                  |
| 13         | IRGC104119           | Chad                     | 45         | WAB0028910           | Mali                     | 77         | WAB0028938           | Nigeria                  |
| 14         | WAB0028934           | Chad                     | 46         | WAB0028958           | Mali                     | 78         | WAB0028940           | Nigeria                  |
| 15         | WAB0028917           | Chad                     | 47         | WAB0028959           | Mali                     | 79         | IRGC103895           | Senegal                  |
| 16         | WAB0028930           | Chad                     | 48         | WAB0028976           | Mali                     | 80         | WAB0028905           | Senegal                  |
| 17         | WAB0028931           | Chad                     | 49         | WAB0028977           | Mali                     | 81         | WAB0028907           | Senegal                  |
| 18         | WAB0028989           | Chad                     | 50         | WAB0028979           | Mali                     | 82         | IRGC101959           | Senegal                  |
| 19         | WAB0028991           | Chad                     | 51         | WAB0028981           | Mali                     | 83         | IRGC106234           | Sierra Leone             |
| 20         | WAB0028919           | Chad                     | 52         | WAB0028916           | Mali                     | 84         | IRGC100927           | Sierra Leone             |
| 21         | WAB0028925           | Chad                     | 53         | WAB0028911           | Mali                     | 85         | WAB0028887           | Tanzania                 |
| 22         | WAB0028926           | Chad                     | 54         | WAB0028912           | Mali                     | 86         | IRGC103912           | Tanzania                 |
| 23         | WAB0028927           | Chad                     | 55         | WAB0028913           | Mali                     | 87         | WAB0028952           | Zambia                   |
| 24         | WAB0028929           | Chad                     | 56         | WAB0028900           | Mali                     | 88         | WAB0028903           | Zambia                   |
| 25         | WAB0028985           | Chad                     | 57         | WAB0028885           | Mali                     | 89         | WAB0030173           | Unknown                  |
| 26         | WAB0028992           | Chad                     | 58         | WAB0028893           | Mali                     | 90         | WAB0026768           | Unknown                  |
| 27         | WAB0028998           | Chad                     | 59         | WAB0028894           | Mali                     | 91         | IRGC100921           | Unknown                  |
| 28         | WAB0030151           | Chad                     | 60         | WAB0028915           | Mali                     | 92         | IRGC100922           | Unknown                  |
| 29         | IRGC100122           | Gambia                   | 61         | WAB0030186           | Mali                     | 93         | IRGC100939           | Unknown                  |
| 30         | WAB0028874           | Gambia                   | 62         | WAB0012712           | Mali                     | 94         | IRGC101252           | Unknown                  |
| 31         | WAB0028967           | Gambia                   | 63         | IRGC101240           | Mali                     |            |                      |                          |
| 32         | WAB0028972           | Gambia                   | 64         | IRGC103534           | Mali                     |            |                      |                          |

\*Accession numbers starting with “WAB” were obtained from African Rice Center. The remaining accessions were obtained from the International Rice Research Institute.

**Supplementary Table 15. Partitioning of ancestry within *O. barthii* population (94 accessions) based on SNPs data**

| No. | Accession No. | Subpopulation | No. | Accession No. | Subpopulation | No. | Accession No. | Subpopulation |
|-----|---------------|---------------|-----|---------------|---------------|-----|---------------|---------------|
| 1   | IRGC100931    | OB-I          | 33  | WAB0028944    | OB-II         | 65  | WAB0028896    | OB-V          |
| 2   | WAB0028875    | OB-I          | 34  | WAB0028958    | OB-II         | 66  | WAB0028876    | OB-V          |
| 3   | WAB0028877    | OB-II         | 35  | WAB0028985    | OB-II         | 67  | WAB0028874    | OB-V          |
| 4   | WAB0028975    | OB-I          | 36  | WAB0028994    | OB-II         | 68  | WAB0028947    | OB-V          |
| 5   | WAB0028946    | OB-I          | 37  | WAB0028882    | OB-II         | 69  | WAB0028956    | OB-V          |
| 6   | WAB0028976    | OB-I          | 38  | WAB0028884    | OB-II         | 70  | WAB0028957    | OB-V          |
| 7   | WAB0028977    | OB-I          | 39  | WAB0028952    | OB-III        | 71  | WAB0028967    | OB-V          |
| 8   | WAB0028979    | OB-I          | 40  | WAB0028927    | OB-III        | 72  | WAB0028961    | OB-V          |
| 9   | WAB0028980    | OB-I          | 41  | WAB0028992    | OB-III        | 73  | WAB0028972    | OB-V          |
| 10  | WAB0028981    | OB-I          | 42  | WAB0028937    | OB-III        | 74  | WAB0028905    | OB-V          |
| 11  | WAB0028897    | OB-I          | 43  | WAB0009239    | OB-III        | 75  | WAB0028907    | OB-V          |
| 12  | WAB0028916    | OB-I          | 44  | WAB0028938    | OB-III        | 76  | WAB0009240    | OB-V          |
| 13  | WAB0028931    | OB-I          | 45  | WAB0028940    | OB-III        | 77  | WAB0028996    | OB-V          |
| 14  | IRGC101240    | OB-I          | 46  | IRGC106234    | OB-IV         | 78  | WAB0028997    | OB-V          |
| 15  | IRGC103534    | OB-I          | 47  | WAB0028987    | OB-IV         | 79  | WAB0028919    | OB-V          |
| 16  | IRGC103912    | OB-II         | 48  | WAB0028910    | OB-IV         | 80  | WAB0028948    | OB-V          |
| 17  | IRGC104119    | OB-II         | 49  | WAB0028911    | OB-IV         | 81  | WAB0030173    | OB-V          |
| 18  | IRGC105608    | OB-II         | 50  | WAB0028912    | OB-IV         | 82  | WAB0028889    | OB-V          |
| 19  | WAB0029000    | OB-II         | 51  | WAB0028913    | OB-IV         | 83  | WAB0028959    | OB-V          |
| 20  | WAB0028934    | OB-II         | 52  | WAB0028900    | OB-IV         | 84  | WAB0028998    | OB-V          |
| 21  | WAB0028917    | OB-II         | 53  | WAB0028893    | OB-IV         | 85  | WAB0028885    | OB-V          |
| 22  | WAB0028942    | OB-II         | 54  | WAB0028894    | OB-IV         | 86  | WAB0024904    | OB-V          |
| 23  | WAB0028903    | OB-II         | 55  | WAB0028915    | OB-IV         | 87  | WAB0026769    | OB-V          |
| 24  | WAB0028983    | OB-II         | 56  | WAB0030186    | OB-IV         | 88  | WAB0026770    | OB-V          |
| 25  | WAB0028930    | OB-II         | 57  | WAB0030151    | OB-IV         | 89  | WAB0012712    | OB-V          |
| 26  | WAB0028887    | OB-II         | 58  | IRGC100922    | OB-IV         | 90  | WAB0026768    | OB-V          |
| 27  | WAB0028989    | OB-II         | 59  | IRGC100927    | OB-IV         | 91  | IRGC100939    | OB-V          |
| 28  | WAB0028991    | OB-II         | 60  | IRGC100122    | OB-V          | 92  | IRGC101252    | OB-V          |
| 29  | WAB0028993    | OB-II         | 61  | IRGC100921    | OB-V          | 93  | IRGC101381    | OB-V          |
| 30  | WAB0028925    | OB-II         | 62  | IRGC100934    | OB-V          | 94  | IRGC101959    | OB-V          |
| 31  | WAB0028926    | OB-II         | 63  | IRGC103895    | OB-V          |     |               |               |
| 32  | WAB0028929    | OB-II         | 64  | IRGC104084    | OB-V          |     |               |               |

**Supplementary Table 16. *O. glaberrima* accessions used for analyzing the genetic relationship between *O. glaberrima* and *O. barthii*\***

| <b>No.</b> | <b>Species</b>       | <b>Accession No.</b> | <b>Country of Origin</b> |
|------------|----------------------|----------------------|--------------------------|
| 1          | <i>O. glaberrima</i> | IRGC103469           | Burkina Faso             |
| 2          | <i>O. glaberrima</i> | TOG5923              | Liberia                  |
| 3          | <i>O. glaberrima</i> | TOG5949              | Liberia                  |
| 4          | <i>O. glaberrima</i> | TOG5467              | Nigeria                  |
| 5          | <i>O. glaberrima</i> | TOG5457              | Nigeria                  |
| 6          | <i>O. glaberrima</i> | TOG7025              | Sierra Leone             |
| 7          | <i>O. glaberrima</i> | TOG7102              | Mali                     |
| 8          | <i>O. glaberrima</i> | IRGC67563            | Ghana                    |
| 9          | <i>O. glaberrima</i> | IRGC68939            | Madagascar               |
| 10         | <i>O. glaberrima</i> | IRGC68976            | Guyana                   |
| 11         | <i>O. glaberrima</i> | IRGC75500            | Burkina Faso             |
| 12         | <i>O. glaberrima</i> | IRGC96841            | Zimbabwe                 |
| 13         | <i>O. glaberrima</i> | IRGC101049           | Senegal                  |
| 14         | <i>O. glaberrima</i> | IRGC103472           | Burkina Faso             |
| 15         | <i>O. glaberrima</i> | IRGC103520           | Mali                     |
| 16         | <i>O. glaberrima</i> | IRGC103632           | Mali                     |
| 17         | <i>O. glaberrima</i> | IRGC103937           | Liberia                  |
| 18         | <i>O. glaberrima</i> | IRGC104206           | Ghana                    |
| 19         | <i>O. glaberrima</i> | IRGC104574           | Mali                     |
| 20         | <i>O. glaberrima</i> | IRGC104955           | Sierra Leone             |

**\*Accession numbers starting with “TOG” were obtained from African Rice Center. The remaining accessions were obtained from the International Rice Research Institute.**

**Supplementary Table 17.  $F_{ST}$  values between *O. glaberrima* (OG) and each *O. barthii* subgroups (OB-I to OB-V)**

|               | <b>OG</b> |
|---------------|-----------|
| <b>OB_I</b>   | 0.14438   |
| <b>OB_II</b>  | 0.099778  |
| <b>OB_III</b> | 0.36987   |
| <b>OB_IV</b>  | 0.055195  |
| <b>OB_V</b>   | 0.0096748 |

**Supplementary Table 18. Summary of geographic distribution of *O. barthii* accessions of different subgroups**

| Country of Origin | Groups |       |        |       |       | Number of Accessions |
|-------------------|--------|-------|--------|-------|-------|----------------------|
|                   | OB-I   | OB-II | OB-III | OB-IV | OB-V  |                      |
| Gambia            | 0      | 0     | 0      | 0     | 1     | 4                    |
| Guinea            | 0      | 0     | 0      | 0     | 1     | 4                    |
| Senegal           | 0      | 0     | 0      | 0     | 1     | 4                    |
| Sierra Leone      | 0      | 0     | 0      | 1     | 0     | 2                    |
| Nigeria           | 0      | 0.08  | 0.34   | 0.08  | 0.5   | 12                   |
| Mali              | 0.43   | 0.04  | 0      | 0.32  | 0.21  | 28                   |
| Niger             | 0.5    | 0     | 0      | 0     | 0.5   | 2                    |
| Cameroon          | 0.09   | 0.64  | 0      | 0     | 0.27  | 11                   |
| Chad              | 0.06   | 0.6   | 0.125  | 0.06  | 0.125 | 16                   |
| Zambia            | 0      | 0.5   | 0.5    | 0     | 0     | 2                    |
| Botswana          | 0      | 1     | 0      | 0     | 0     | 1                    |
| Tanzania          | 0.5    | 0.5   | 0      | 0     | 0     | 2                    |
| Unknown           | 0      | 0     | 0      | 0.33  | 0.67  | 6                    |



**Supplementary Table 19. *O. barthii* accessions used for investigating artificial selection in *O. glaberrima***

| <b>No</b> | <b>Species</b>    | <b>Accession No.</b> | <b>Country of Origin</b> |
|-----------|-------------------|----------------------|--------------------------|
| 1         | <i>O. barthii</i> | IRGC100122           | Gambia                   |
| 2         | <i>O. barthii</i> | IRGC100931           | Mali                     |
| 3         | <i>O. barthii</i> | IRGC100934           | Mali                     |
| 4         | <i>O. barthii</i> | IRGC103895           | Senegal                  |
| 5         | <i>O. barthii</i> | IRGC104084           | Nigeria                  |
| 6         | <i>O. barthii</i> | IRGC104119           | Chad                     |
| 7         | <i>O. barthii</i> | IRGC105608           | Cameroon                 |
| 8         | <i>O. barthii</i> | IRGC106234           | Sierra Leone             |
| 9         | <i>O. barthii</i> | IRGC103912           | Tanzania                 |
| 10        | <i>O. barthii</i> | WAB0028952           | Zambia                   |
| 11        | <i>O. barthii</i> | WAB0028903           | Zambia                   |
| 12        | <i>O. barthii</i> | WAB0028980           | Mali                     |
| 13        | <i>O. barthii</i> | WAB0028987           | Nigeria                  |
| 14        | <i>O. barthii</i> | WAB0028958           | Mali                     |
| 15        | <i>O. barthii</i> | WAB0028976           | Mali                     |
| 16        | <i>O. barthii</i> | WAB0028979           | Mali                     |
| 17        | <i>O. barthii</i> | WAB0028992           | Chad                     |
| 18        | <i>O. barthii</i> | WAB0028938           | Nigeria                  |
| 19        | <i>O. barthii</i> | WAB0030151           | Chad                     |

**\*Accession numbers starting with “WAB” were obtained from African Rice Center. The remaining accessions were obtained from the International Rice Research Institute.**

**Supplementary Table 20. Genome wide detection of regions under selective sweeps during the domestication of *O. glaberrima* by comparing genetic diversity of *O. glaberrima* and *O. barthii* group V (OB-V)**

| Chromosome | Interval (Mb) | $\pi_w/\pi_c$ | <i>O. glaberrima</i> orthologs of known gene or loci in <i>O. sativa</i> ssp. <i>japonica</i> |
|------------|---------------|---------------|-----------------------------------------------------------------------------------------------|
| 1          | 16.9-17       | 6.165017386   |                                                                                               |
| 1          | 17.7-17.8     | 5.833727381   |                                                                                               |
| 1          | 18.3-18.4     | 6.156131663   |                                                                                               |
| 1          | 30.3-30.4     | 5.822852867   |                                                                                               |
| 1          | 31.4-31.5     | 6.617159947   |                                                                                               |
| 1          | 31.5-31.6     | 8.135254577   |                                                                                               |
| 1          | 31.6-31.7     | 7.584467728   |                                                                                               |
| 1          | 31.7-31.8     | 6.053773847   |                                                                                               |
| 2          | 2.6-2.7       | 6.294149825   |                                                                                               |
| 2          | 2.7-2.8       | 6.08949706    |                                                                                               |
| 2          | 6.2-6.3       | 6.414645744   |                                                                                               |
| 2          | 13.9-14       | 6.524117999   |                                                                                               |
| 3          | 1-1.1         | 6.767033941   |                                                                                               |
| 3          | 12-12.1       | 6.140314363   |                                                                                               |
| 3          | 31.5-31.6     | 6.272661611   |                                                                                               |
| 4          | 5.5-5.6       | 6.025091367   |                                                                                               |
| 4          | 6.4-6.5       | 5.823483665   |                                                                                               |
| 4          | 8.3-8.4       | 6.742639939   |                                                                                               |
| 4          | 8.5-8.6       | 5.929918359   |                                                                                               |
| 4          | 8.6-8.7       | 6.685373561   |                                                                                               |
| 4          | 8.7-8.8       | 7.312704191   |                                                                                               |
| 4          | 9.1-9.2       | 6.901842129   |                                                                                               |
| 4          | 15.6-15.7     | 6.845406423   | <i>badh2</i>                                                                                  |
| 4          | 17.2-17.3     | 6.64734209    |                                                                                               |
| 4          | 18.7-18.8     | 10.27095385   |                                                                                               |
| 4          | 20.7-20.8     | 6.592118188   |                                                                                               |
| 4          | 21.1-21.2     | 7.145963698   |                                                                                               |
| 5          | 0.8-0.9       | 6.820534889   |                                                                                               |
| 5          | 19.7-19.8     | 6.153361673   |                                                                                               |
| 5          | 20.5-20.6     | 6.460170114   |                                                                                               |
| 6          | 4.4-4.5       | 5.946290135   |                                                                                               |
| 6          | 5.2-5.3       | 6.157487611   |                                                                                               |
| 6          | 15-15.1       | 7.782344867   |                                                                                               |
| 6          | 16.7-16.8     | 7.935773318   |                                                                                               |
| 6          | 19.1-19.2     | 6.956370115   |                                                                                               |

|    |           |             |
|----|-----------|-------------|
| 6  | 19.2-19.3 | 8.080605029 |
| 6  | 19.3-19.4 | 6.463177199 |
| 6  | 19.6-19.7 | 7.14640548  |
| 6  | 20.9-21   | 5.94268207  |
| 6  | 21.1-21.2 | 6.01502746  |
| 6  | 21.8-21.9 | 7.433686046 |
| 6  | 21.9-22   | 6.407995227 |
| 6  | 22-22.1   | 8.776432892 |
| 6  | 22.8-22.9 | 6.050073719 |
| 6  | 22.9-23   | 8.073736639 |
| 6  | 23-23.1   | 8.021476407 |
| 7  | 8.3-8.4   | 5.869798702 |
| 7  | 15.6-15.7 | 6.483087638 |
| 7  | 17.2-17.3 | 6.266461188 |
| 7  | 19.3-19.4 | 6.007596813 |
| 7  | 21-21.1   | 6.081882037 |
| 8  | 1.4-1.5   | 7.16874163  |
| 8  | 1.5-1.6   | 6.052208826 |
| 8  | 2.4-2.5   | 5.90584113  |
| 8  | 2.5-2.6   | 7.156352859 |
| 8  | 3.8-3.9   | 5.980708514 |
| 8  | 11-11.1   | 8.905743933 |
| 8  | 11.1-11.2 | 8.822678726 |
| 8  | 13.6-13.7 | 5.931757793 |
| 9  | 14.7-14.8 | 8.793988931 |
| 9  | 16.2-16.3 | 6.975116499 |
| 10 | 0.2-0.3   | 6.07593137  |
| 10 | 3.3-3.4   | 5.822625614 |
| 10 | 10.9-11   | 5.906312458 |
| 11 | 15-15.1   | 5.836107484 |
| 11 | 17.8-17.9 | 6.521209811 |
| 12 | 1.4-1.5   | 6.442102085 |
| 12 | 1.9-2     | 5.965681589 |
| 12 | 2-2.1     | 7.603855214 |
| 12 | 7.6-7.7   | 7.113233549 |
| 12 | 15.3-15.4 | 9.876422448 |
| 12 | 15.4-15.5 | 7.035851392 |

---

**Supplementary Table 21. List of agronomically important genes whose homologues are located close, within the window of LD decay (<251 Kb), to genomic regions with strong evidence of recent selective sweeps in *O. glaberrima***

| <b>Chromosome</b> | <b>Gene</b>   | <b>Gene Function</b>                      | <b>Gene Coordinates</b> | <b>Position of CLR peak</b> | <b>CLR</b> |
|-------------------|---------------|-------------------------------------------|-------------------------|-----------------------------|------------|
| <b>1</b>          | <i>Sd1</i>    | <i>Semi-dwarfism</i>                      | 28,541,899-28,544,581   | 28,529,624                  | 159.39     |
| <b>1</b>          | <i>OsNAC6</i> | <i>Abiotic resistance, salt tolerance</i> | 28,555,290-28,556,940   | 28,529,624                  | 159.39     |
| <b>2</b>          | <i>EP3</i>    | <i>Grain number</i>                       | 8,382,639-8,383,865     | 8,490,987                   | 174.19     |
| <b>4</b>          | <i>Sh4</i>    | <i>Shattering</i>                         | 25,150,788-25,152,622   | 25,087,584                  | 135.53     |
| <b>7</b>          | <i>Ep2</i>    | <i>Panicle</i>                            | 18,073,478-18,080,578   | 18,264,800                  | 152.23     |
| <b>9</b>          | <i>Sub1</i>   | <i>Abiotic resistance, submerge</i>       | 4,605,563-4,606,261     | 4,436,071                   | 150.22     |
| <b>11</b>         | <i>Xa26</i>   | <i>Biotic resistance, blight</i>          | 20,470,000-20,485,675   | 20,380,430                  | 146.19     |

**Supplementary Table 23. *O. sativa* accessions used for investigating introgression**

| <b>No</b> | <b>Species</b>                        | <b>Accessions<br/>No.</b> | <b>Country of<br/>Origin</b> |
|-----------|---------------------------------------|---------------------------|------------------------------|
| 1         | <i>O. sativa</i> ssp. <i>japonica</i> | IRGC58398                 | Brunel                       |
| 2         | <i>O. sativa</i> ssp. <i>japonica</i> | IRGC58716                 | Bangladesh                   |
| 3         | <i>O. sativa</i> ssp. <i>japonica</i> | IRGC3860                  | Philippines                  |
| 4         | <i>O. sativa</i> ssp. <i>japonica</i> | IRGC28275                 | Pakistan                     |
| 5         | <i>O. sativa</i> ssp. <i>japonica</i> | IRGC32298                 | Iran                         |
| 6         | <i>O. sativa</i> ssp. <i>japonica</i> | IRGC36420                 | Sri Lanka                    |
| 7         | <i>O. sativa</i> ssp. <i>japonica</i> | IRGC56350                 | Senegal                      |
| 8         | <i>O. sativa</i> ssp. <i>indica</i>   | IRGC9505                  | Iraq                         |
| 9         | <i>O. sativa</i> ssp. <i>indica</i>   | IRGC12880                 | Iran                         |
| 10        | <i>O. sativa</i> ssp. <i>indica</i>   | IRGC13793                 | Brunel                       |
| 11        | <i>O. sativa</i> ssp. <i>indica</i>   | IRGC32441                 | Bhutan                       |
| 12        | <i>O. sativa</i> ssp. <i>indica</i>   | IRGC58267                 | Afghanistan                  |
| 13        | <i>O. sativa</i> ssp. <i>indica</i>   | IRGC50409                 | Brazil                       |
| 14        | <i>O. sativa</i> ssp. <i>indica</i>   | IRGC69559                 | Egypt                        |

**Supplementary Table 24. Homologues of domestication genes in *O. glaberrima***

| No. | Gene name                   | Function                 | Locus ID                                    |                                           |
|-----|-----------------------------|--------------------------|---------------------------------------------|-------------------------------------------|
|     |                             |                          | <i>Oryza sativa</i> ssp.<br><i>japonica</i> | <i>Oryza glaberrima</i>                   |
| 1   | <i>Gn1a</i> <sup>1</sup>    | Grain productivity       | LOC_Os01g10110                              | ORGLA01g0059300                           |
| 2   | <i>qSH1</i> <sup>2</sup>    | Shattering               | LOC_Os01g62920                              | ORGLA01G0311100                           |
| 3   | <i>sd1</i> <sup>3</sup>     | Semi-dwarfing            | LOC_Os01g66100                              | ORGLA01g0334700                           |
| 4   | <i>GW2</i> <sup>4</sup>     | Grain width              | LOC_Os02g14720                              | ORGLA02g0093000                           |
| 5   | <i>GS3</i> <sup>5</sup>     | Grain size/shape         | LOC_Os03g29380                              | ORGLA03g0195600                           |
| 6   | <i>OsSh1</i> <sup>6</sup>   | Shattering               | LOC_Os03g44710                              | <b>Deleted in <i>Oryza glaberrima</i></b> |
| 7   | <i>GIF1</i> <sup>7</sup>    | Grain incomplete filling | LOC_Os04g33740                              | ORGLA04g0089800                           |
| 8   | <i>badh2.1</i> <sup>8</sup> | Flavor or fragrance      | LOC_Os04g39020                              | ORGLA04g0122100                           |
| 9   | <i>Phr1</i> <sup>9</sup>    | Grain discoloration      | LOC_Os04g53300                              | ORGLA04g0229000                           |
| 10  | <i>OsLGI</i> <sup>10</sup>  | Closed panicle           | LOC_Os04g56170                              | ORGLA04G0242500                           |
| 11  | <i>Sh4</i> <sup>11</sup>    | Shattering               | LOC_Os04g57530                              | ORGLA04G0254300                           |
| 12  | <i>Hd1</i> <sup>12</sup>    | Flowering time           | LOC_Os06g16370                              | <b>Deleted in <i>Oryza glaberrima</i></b> |
| 13  | <i>MOC1</i> <sup>13</sup>   | Tillering                | LOC_Os06g40780                              | ORGLA06g0172100                           |
| 14  | <i>PROG1</i> <sup>14</sup>  | Plant Architecture       | LOC_Os07g05900                              | Not found                                 |
| 15  | <i>Rc</i> <sup>15</sup>     | Red pericarp             | LOC_Os07g11020                              | ORGLA07g0060000                           |
| 16  | <i>Sdr4</i> <sup>16</sup>   | Seed dormancy            | LOC_Os07g39700                              | ORGLA07g0155600                           |
| 17  | <i>Ep2</i> <sup>17</sup>    | Erect panicle            | LOC_Os07g42410                              | ORGLA07g0170500                           |
| 18  | <i>Ipa1</i> <sup>18</sup>   | Ideal plant architecture | LOC_Os08g39890                              | ORGLA08g0176500                           |
| 19  | <i>Depl</i> <sup>19</sup>   | Panicle architecture     | LOC_Os09g26999                              | ORGLA09g0089300                           |

**Supplementary Table 25. Tajima's D of 20 domestication genes in *O. glaberrima* and *O. barthii***

| Gene                     | Species              | Sample size | Sequence length | Tajima's D       |
|--------------------------|----------------------|-------------|-----------------|------------------|
| <i>Gn1a</i>              | <i>O. glaberrima</i> | 20          | 4472            | 0.35195          |
|                          | <i>O. barthii</i>    | 19          | 4472            | 0.07865          |
| <i>qSH1</i>              | <i>O. glaberrima</i> | 20          | 3888            | <b>-2.12828*</b> |
|                          | <i>O. barthii</i>    | 19          | 3888            | 0.08885          |
| <i>Sd1</i>               | <i>O. glaberrima</i> | 20          | 3094            | <b>-2.14531*</b> |
|                          | <i>O. barthii</i>    | 19          | 3094            | -1.27688         |
| <i>Gw2</i>               | <i>O. glaberrima</i> | 20          | 6616            | -1.64913         |
|                          | <i>O. barthii</i>    | 19          | 6616            | -1.84678         |
| <i>GS3</i>               | <i>O. glaberrima</i> | 20          | 5718            | 0.17269          |
|                          | <i>O. barthii</i>    | 19          | 5718            | -1.69595         |
| <i>GIF1</i>              | <i>O. glaberrima</i> | 20          | 14338           | -1.95942         |
|                          | <i>O. barthii</i>    | 19          | 14338           | -0.93243         |
| <i>badh2</i>             | <i>O. glaberrima</i> | 20          | 4441            | -1.8539          |
|                          | <i>O. barthii</i>    | 19          | 4441            | -1.97349         |
| <i>Phr1</i>              | <i>O. glaberrima</i> | 20          | 2326            | -1.16689         |
|                          | <i>O. barthii</i>    | 19          | 2326            | -0.58515         |
| <i>OsLG1</i>             | <i>O. glaberrima</i> | 20          | 3424            | -1.4346          |
|                          | <i>O. barthii</i>    | 19          | 3424            | -1.03152         |
| <i>Sh4</i>               | <i>O. glaberrima</i> | 20          | 1823            | -1.6767          |
|                          | <i>O. barthii</i>    | 19          | 1823            | -0.77275         |
| <i>Moc1</i>              | <i>O. glaberrima</i> | 20          | 14572           | -1.78003         |
|                          | <i>O. barthii</i>    | 19          | 14572           | -0.12163         |
| <i>Rc</i>                | <i>O. glaberrima</i> | 20          | 6890            | -1.51284         |
|                          | <i>O. barthii</i>    | 19          | 6890            | -0.02904         |
| <i>Sdr4</i>              | <i>O. glaberrima</i> | 20          | 1035            | -0.39341         |
|                          | <i>O. barthii</i>    | 19          | 1035            | -1.63067         |
| <i>Ep2</i>               | <i>O. glaberrima</i> | 20          | 7655            | -0.98129         |
|                          | <i>O. barthii</i>    | 19          | 7655            | -1.98277         |
| <i>Ipa1</i>              | <i>O. glaberrima</i> | 20          | 3782            | -1.86788         |
|                          | <i>O. barthii</i>    | 19          | 3782            | -0.01227         |
| <i>Dep1</i>              | <i>O. glaberrima</i> | 20          | 4613            | <b>-2.12144*</b> |
|                          | <i>O. barthii</i>    | 19          | 4613            | -1.3807          |
| <i>Sh4</i><br>(promoter) | <i>O. glaberrima</i> | 20          | 2000            | <b>-2.1306*</b>  |
|                          | <i>O. barthii</i>    | 19          | 2000            | -0.652774        |

**\*Genes in the top 5 percentile of Tajima's D values of all the genes in the genome**

**Supplementary Table 26. Comparison of polymorphism levels of the *qSh1* gene and genome-wide intergenic regions in *O. glaberrima* and *O. barthii***

|                                                    | <i>qSh1</i> | Intergenic regions | Ratio (intergenic/ <i>qSh1</i> ) |
|----------------------------------------------------|-------------|--------------------|----------------------------------|
| $\pi$ ( <i>O. glaberrima</i> )                     | 0.00072     | 0.004799           | 6.665278                         |
| $\pi$ ( <i>O. barthii</i> )                        | 0.00536     | 0.008506           | 1.586941                         |
| Ratio ( <i>O. barthii</i> / <i>O. glaberrima</i> ) | 7.4444      | 1.77245            |                                  |



**Supplementary Table 27. Comparison of polymorphism levels of the *Sd1* gene and genome-wide intergenic regions in *O. glaberrima* and *O. barthii***

|                                                    | <i>Sd1</i> | Intergenic regions | Ratio (intergenic/ <i>Sd1</i> ) |
|----------------------------------------------------|------------|--------------------|---------------------------------|
| $\pi$ ( <i>O. glaberrima</i> )                     | 0.00093    | 0.004799           | 5.160215                        |
| $\pi$ ( <i>O. barthii</i> )                        | 0.0038     | 0.008506           | 2.238421                        |
| Ratio ( <i>O. barthii</i> / <i>O. glaberrima</i> ) | 4.08602    | 1.77245            |                                 |

**Supplementary Table 28. Comparison of polymorphism levels of the *Dep1* gene and genome-wide intergenic regions in *O. glaberrima* and *O. barthii***

|                                                    | <i>Dep1</i> | Intergenic regions | Ratio (intergenic/ <i>Dep1</i> ) |
|----------------------------------------------------|-------------|--------------------|----------------------------------|
| $\pi$ ( <i>O. glaberrima</i> )                     | 0.00048     | 0.004799           | 9.997917                         |
| $\pi$ ( <i>O. barthii</i> )                        | 0.00307     | 0.008506           | 2.770684                         |
| Ratio ( <i>O. barthii</i> / <i>O. glaberrima</i> ) | 6.39583     | 1.77245            |                                  |

**Supplementary Table 29. Comparison of polymorphism levels of the promoter region of the *Sh4* gene in *O. glaberrima* and *O. barthii***

|                                                    | <i>Sh4</i> (Promoter) | Intergenic regions | Ratio (intergenic/ <i>Sh4</i> Promoter) |
|----------------------------------------------------|-----------------------|--------------------|-----------------------------------------|
| $\pi$ ( <i>O. glaberrima</i> )                     | 0.00095               | 0.004799           | 5.051578947                             |
| $\pi$ ( <i>O. barthii</i> )                        | 0.005                 | 0.008506           | 1.7012                                  |
| Ratio ( <i>O. barthii</i> / <i>O. glaberrima</i> ) | 5.263157895           | 1.77245            |                                         |

## Reference:

1. Ashikari, M. Cytokinin Oxidase Regulates Rice Grain Production. *Science* **309**, 741–745 (2005).
2. Konishi, S. *et al.* An SNP caused loss of seed shattering during rice domestication. *Science* **312**, 1392–1396 (2006).
3. Spielmeier, W., Ellis, M. H. & Chandler, P. M. Semidwarf (*sd-1*), ‘green revolution’ rice, contains a defective gibberellin 20-oxidase gene. *Proc. Natl. Acad. Sci. U.S.A.* **99**, 9043–9048 (2002).
4. Song, X.-J., Huang, W., Shi, M., Zhu, M.-Z. & Lin, H.-X. A QTL for rice grain width and weight encodes a previously unknown RING-type E3 ubiquitin ligase. *Nat. Genet.* **39**, 623–630 (2007).
5. Fan, C. *et al.* *GS3*, a major QTL for grain length and weight and minor QTL for grain width and thickness in rice, encodes a putative transmembrane protein. *Theor. Appl. Genet.* **112**, 1164–1171 (2006).
6. Lin, Z. *et al.* Parallel domestication of the *Shattering1* genes in cereals. *Nat. Genet.* **44**, 720–724 (2012).
7. Wang, E. *et al.* Control of rice grain-filling and yield by a gene with a potential signature of domestication. *Nat. Genet.* **40**, 1370–1374 (2008).
8. Kovach, M. J., Calingacion, M. N., Fitzgerald, M. A. & McCouch, S. R. The origin and evolution of fragrance in rice (*Oryza sativa* L.). *Proc. Natl. Acad. Sci. U.S.A.* **106**, 14444–14449 (2009).
9. Yu, Y. *et al.* Independent losses of function in a polyphenol oxidase in rice: differentiation in grain discoloration between subspecies and the role of positive selection under domestication. *Plant Cell* **20**, 2946–2959 (2008).
10. Ishii, T. *et al.* *OsLGI* regulates a closed panicle trait in domesticated rice. *Nat. Genet.* **45**, 462–465 (2013).
11. Li, C., Zhou, A. & Sang, T. Rice domestication by reducing shattering. *Science* **311**, 1936–1939 (2006).
12. Yano, M. *et al.* *Hdl1*, a Major Photoperiod Sensitivity Quantitative Trait Locus in Rice, Is Closely Related to the Arabidopsis Flowering Time Gene *CONSTANS*. *Plant Cell* (2000).
13. Li, X. *et al.* Control of tillering in rice. *Nature* **422**, 618–621 (2003).
14. Tan, L. *et al.* Control of a key transition from prostrate to erect growth in rice domestication. *Nat. Genet.* **40**, 1360–1364 (2008).
15. Sweeney, M. T., Thomson, M. J., Pfeil, B. E. & McCouch, S. Caught red-handed: Rc encodes a basic helix-loop-helix protein conditioning red pericarp in rice. *Plant Cell* **18**, 283–294 (2006).
16. Sugimoto, K. *et al.* Molecular cloning of *Sdr4*, a regulator involved in seed dormancy and domestication of rice. *Proc. Natl. Acad. Sci. U.S.A.* **107**, 5792–5797 (2010).
17. Zhu, K. *et al.* *ERECT PANICLE2* Encodes a Novel Protein That Regulates Panicle Erectness in Indica Rice. *Genetics* **184**, 343–350 (2010).
18. Jiao, Y. *et al.* Regulation of *OsSPL14* by OsmiR156 defines ideal plant architecture in rice. *Nat. Genet.* **42**, 541–544 (2010).
19. Huang, X. *et al.* Natural variation at the *DEP1* locus enhances grain yield in rice.

*Nat. Genet.* **41**, 494–497 (2009).
